# Supplementary material for: Recombination elevates the effective evolutionary rate and facilitates the establishment of HIV-1 infection in infants after mother-to-child transmission
Source: PubMed Central journal article supplement (PMC4647327; doi:10.1186/s12977-015-0222-0), 2015-11-16

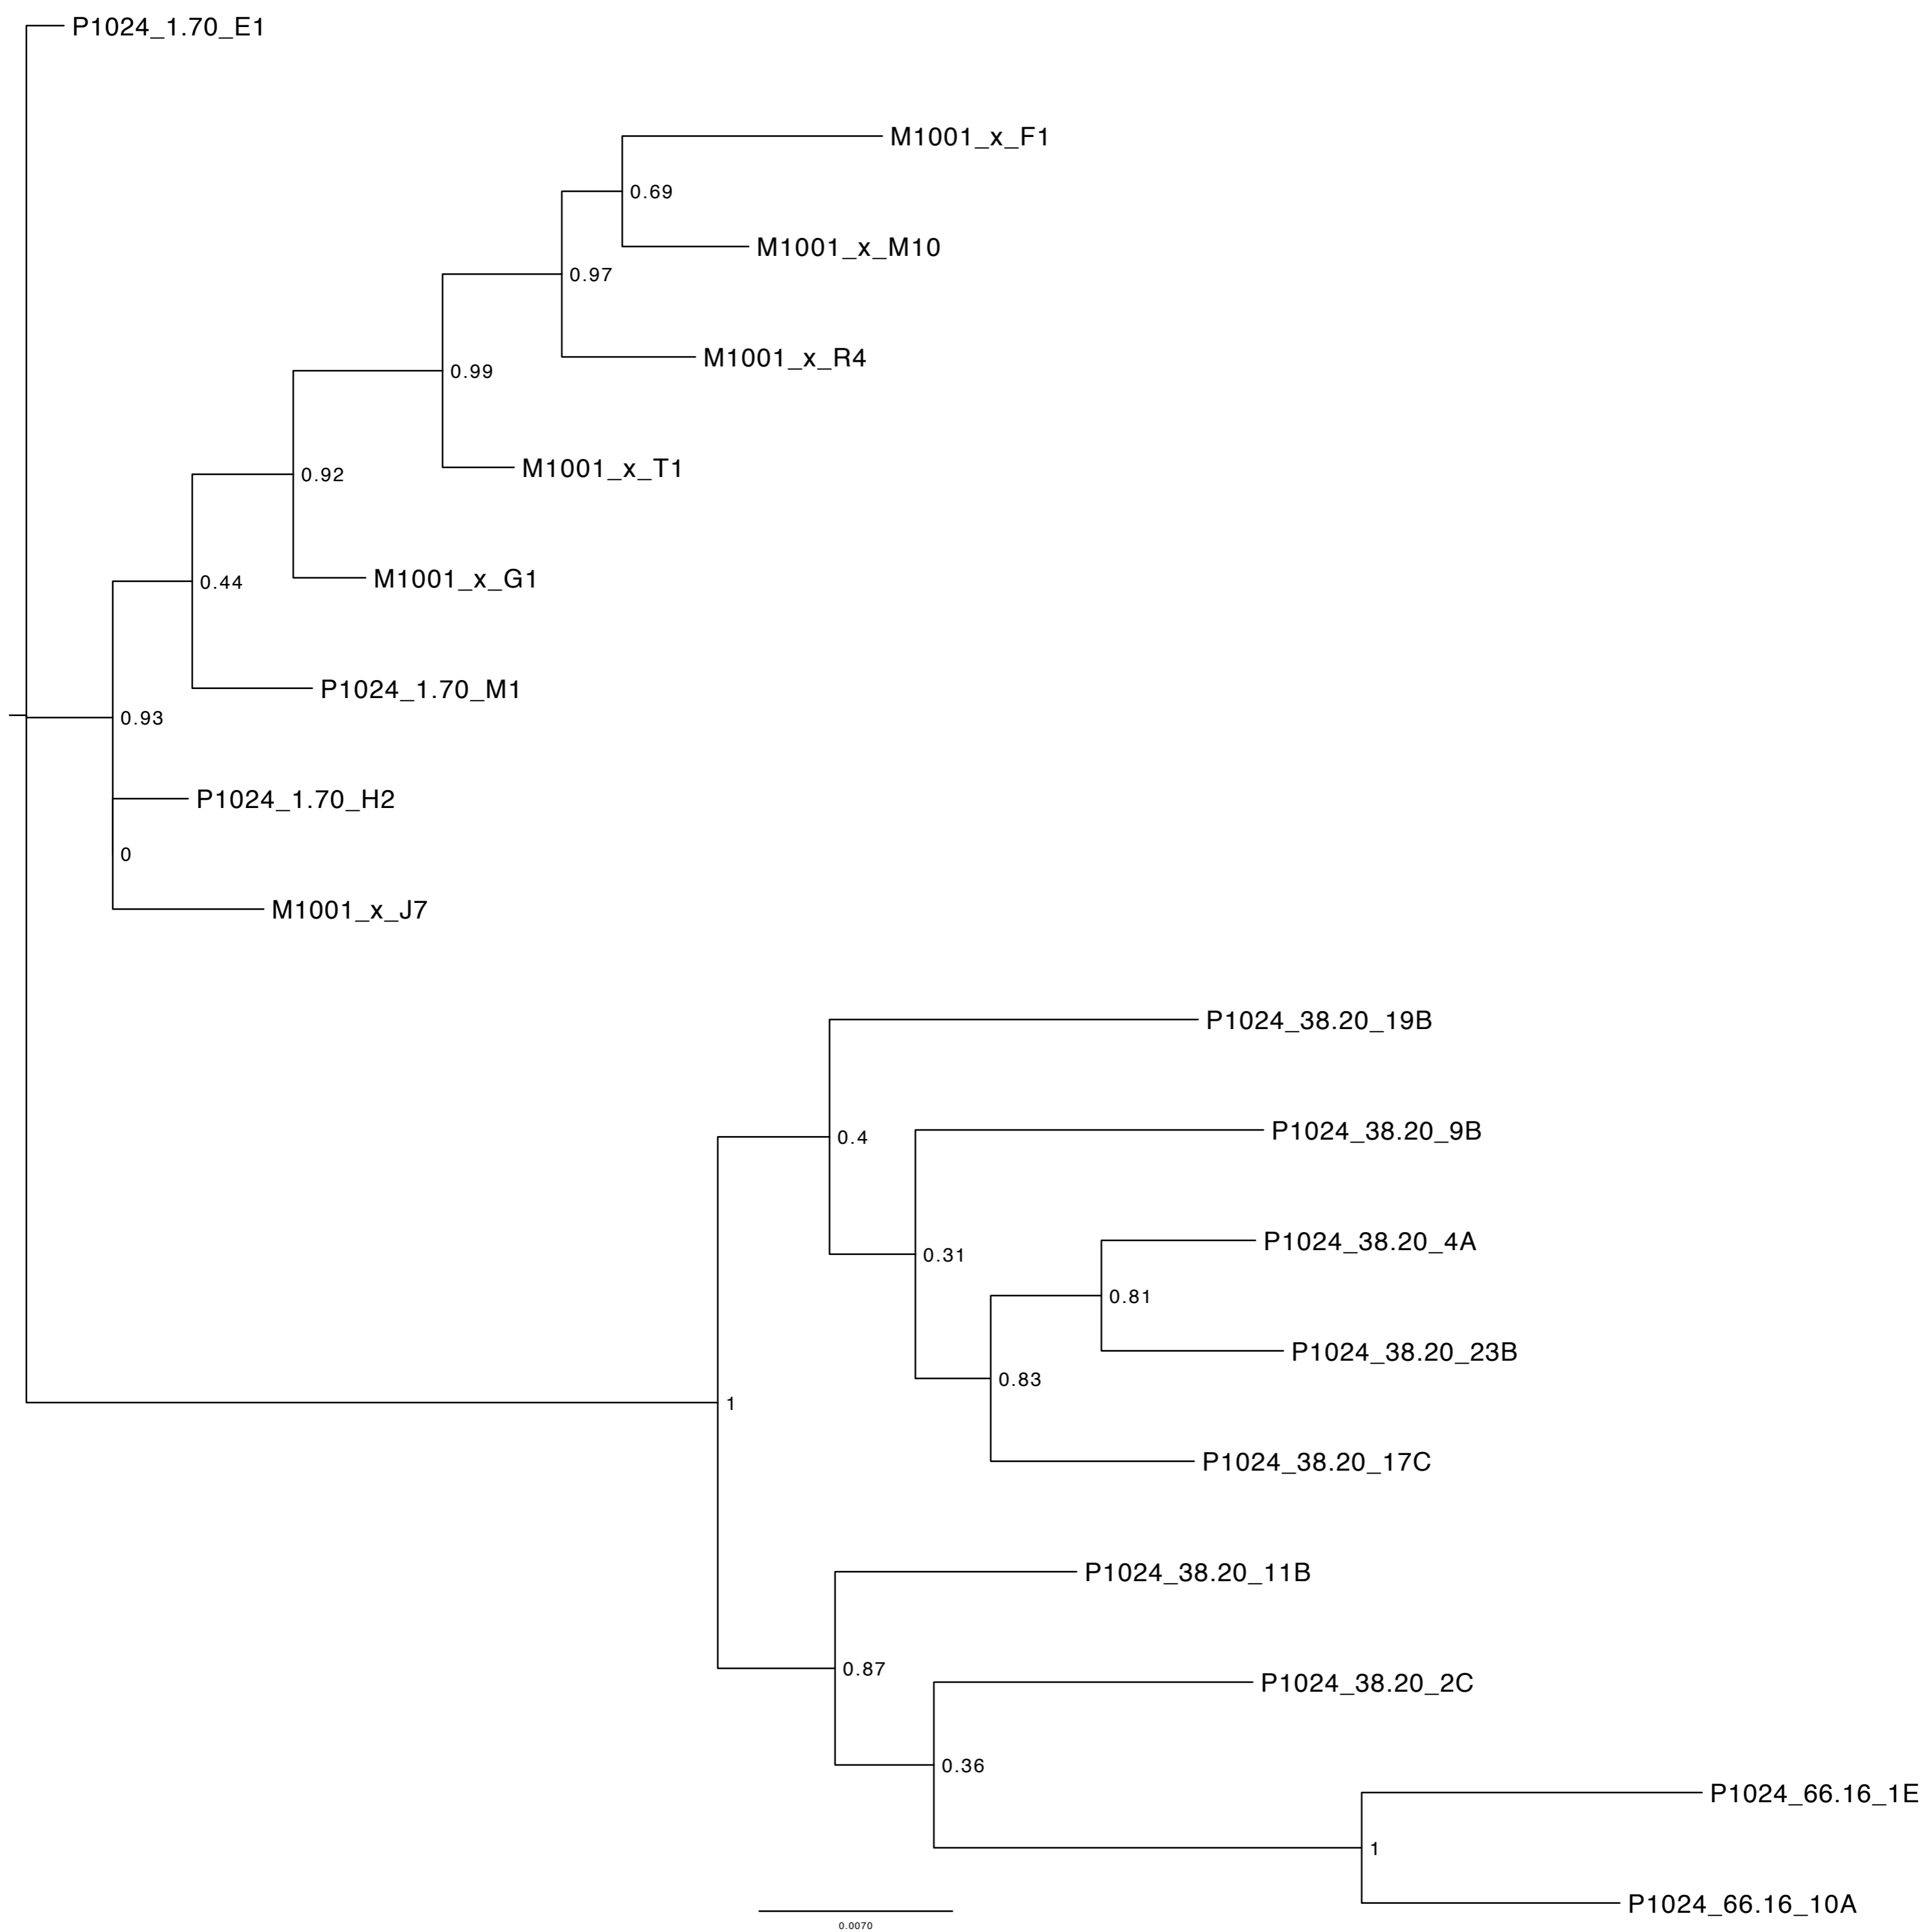

0.0010

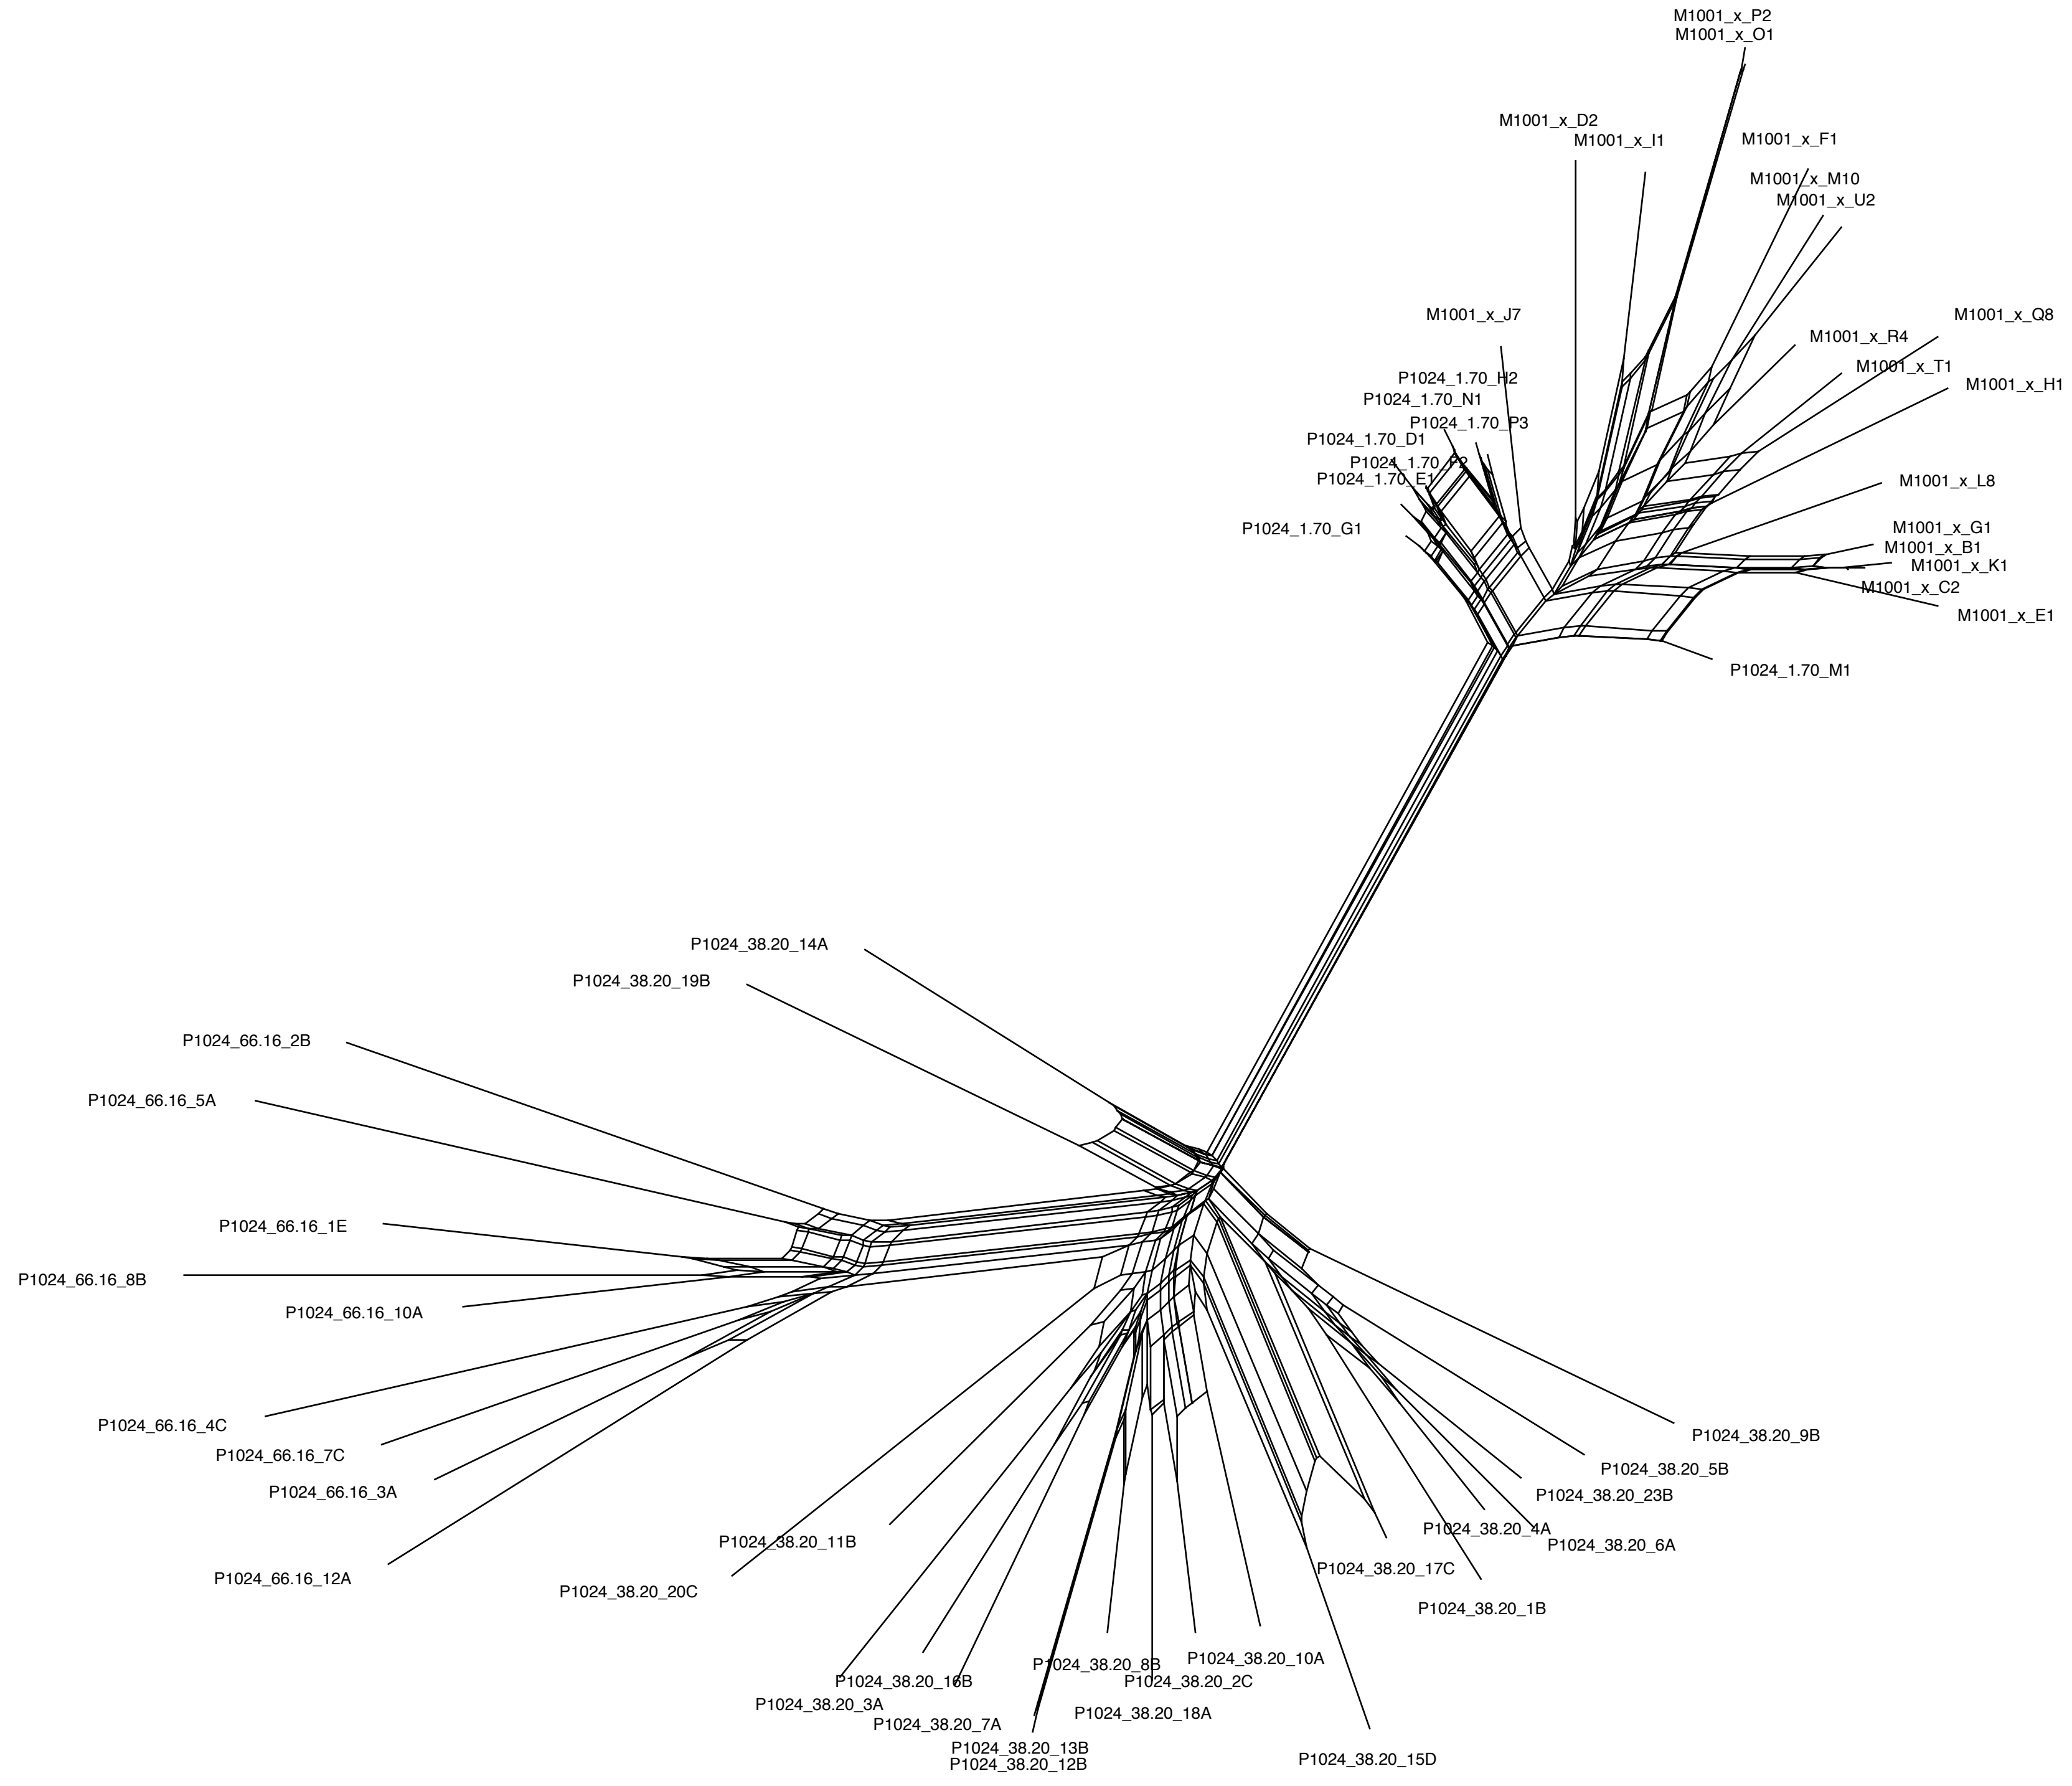

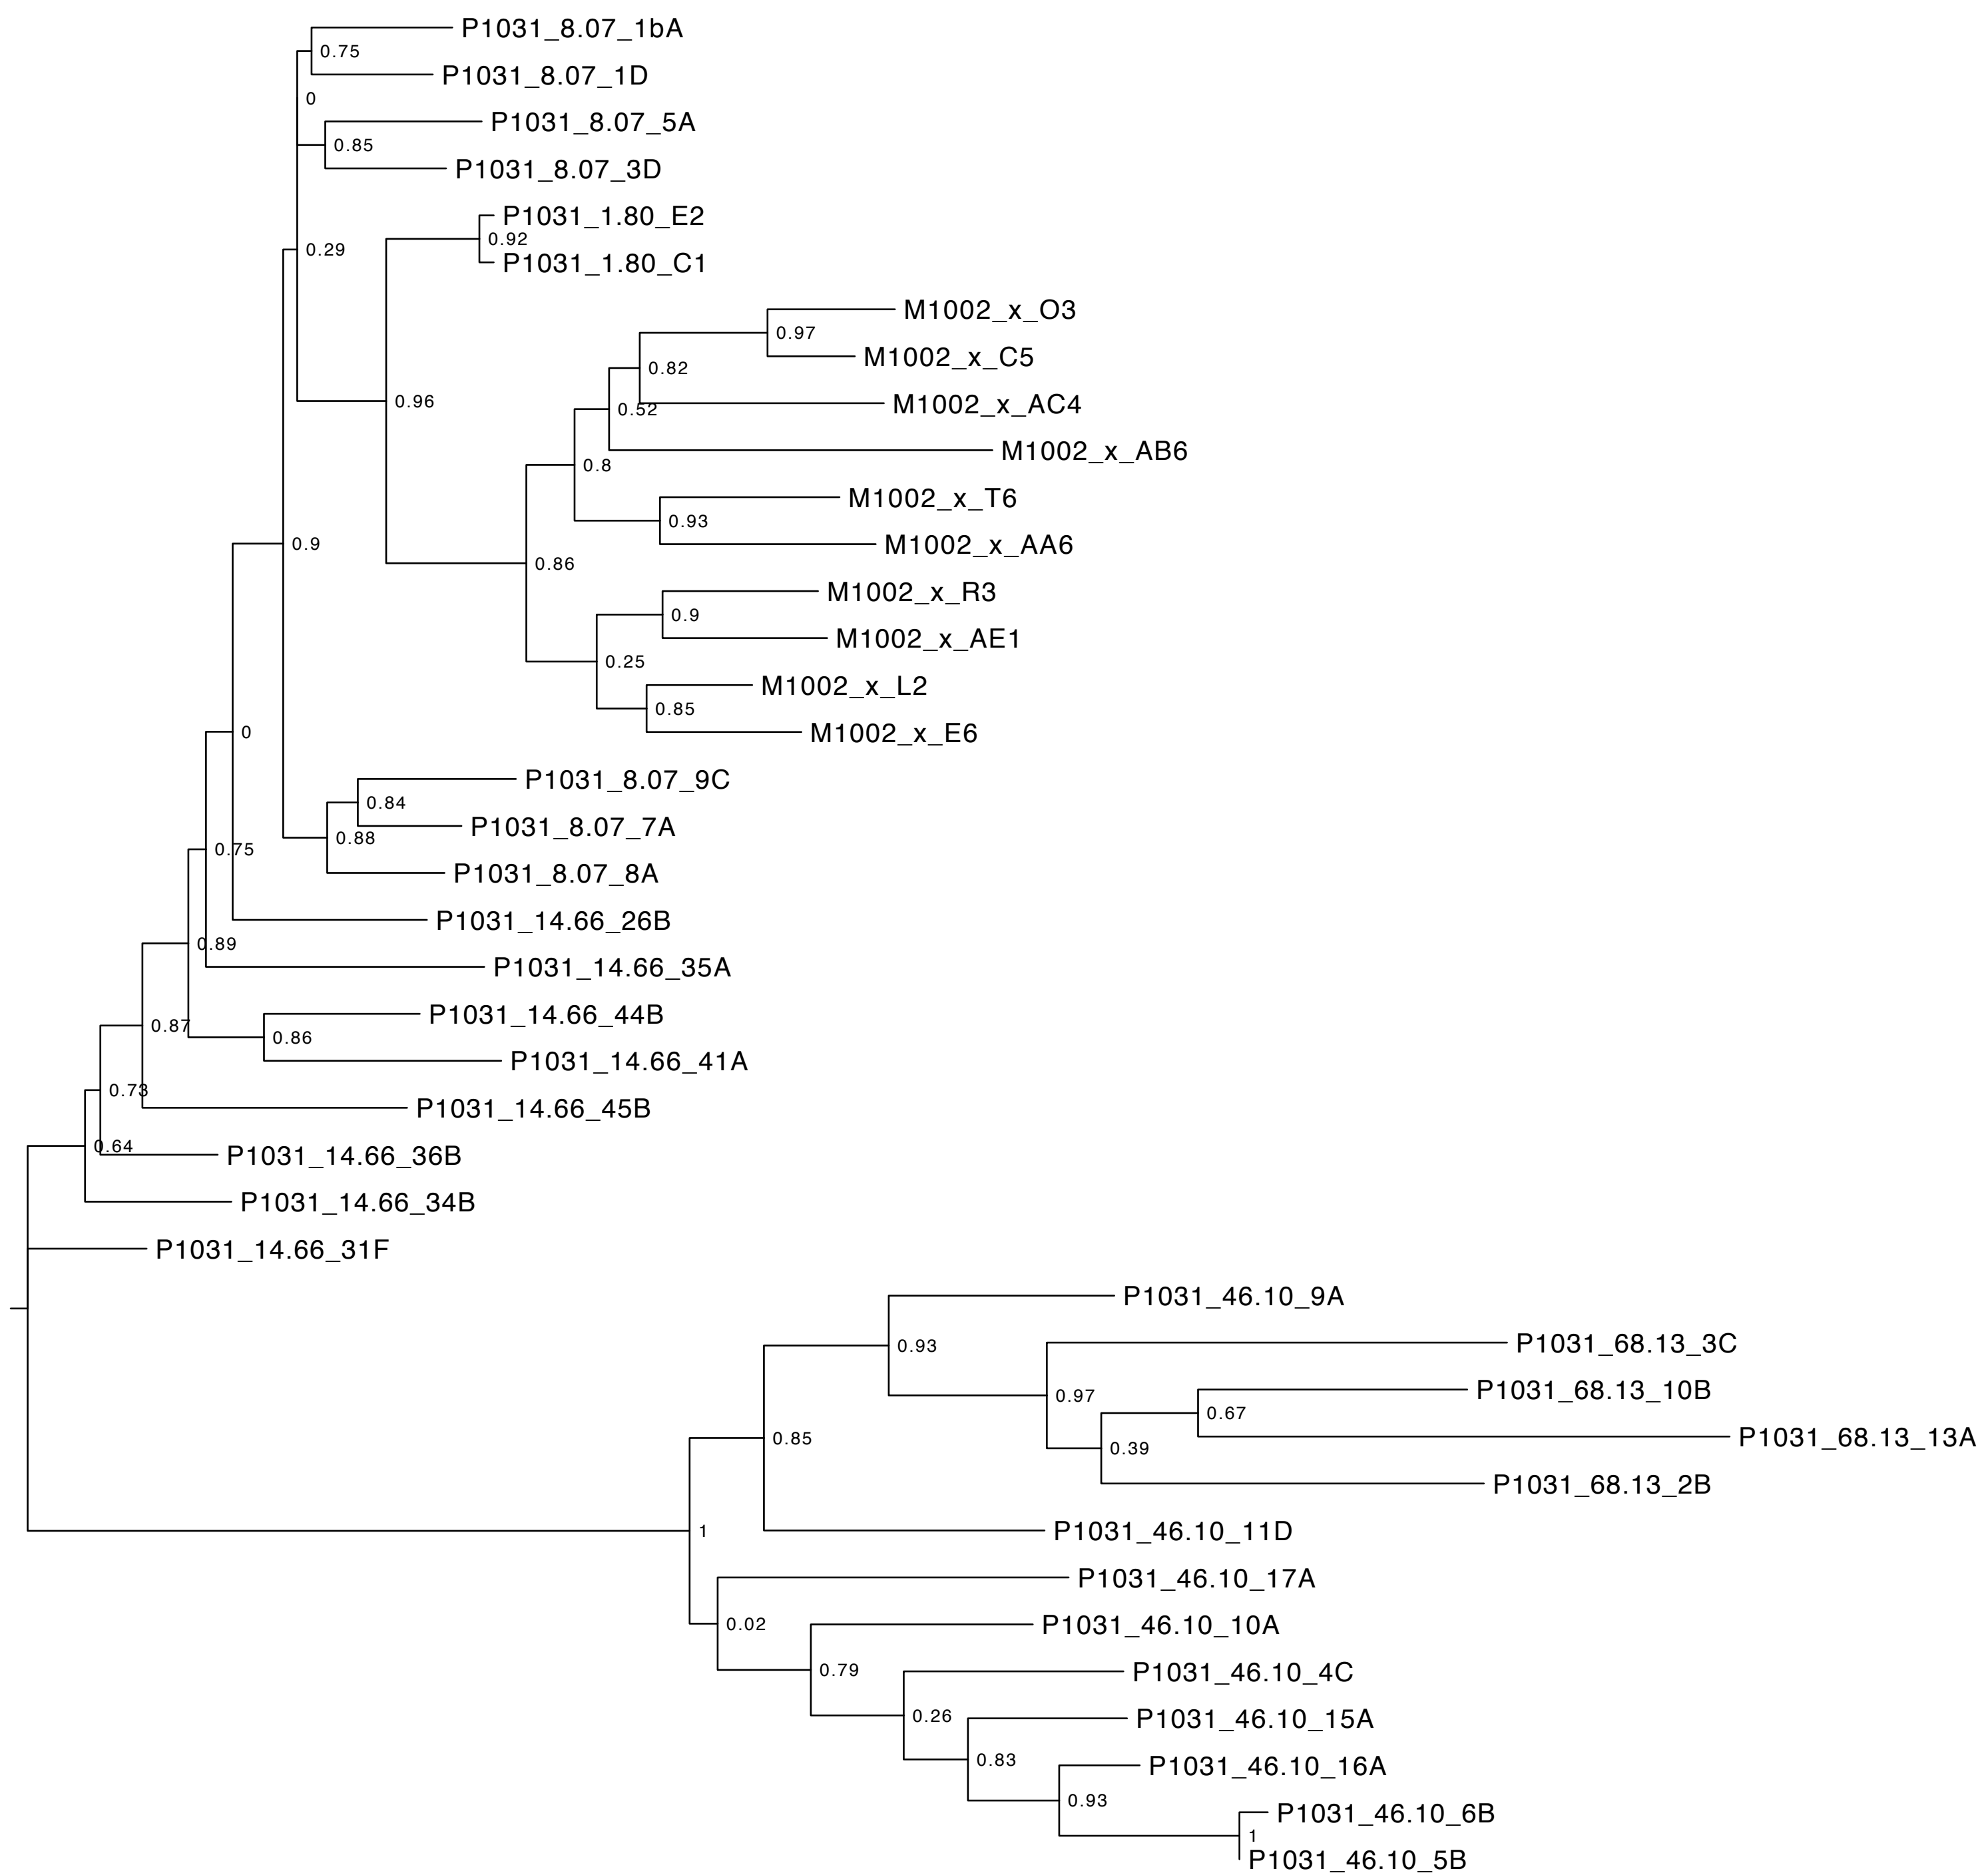

0.0010

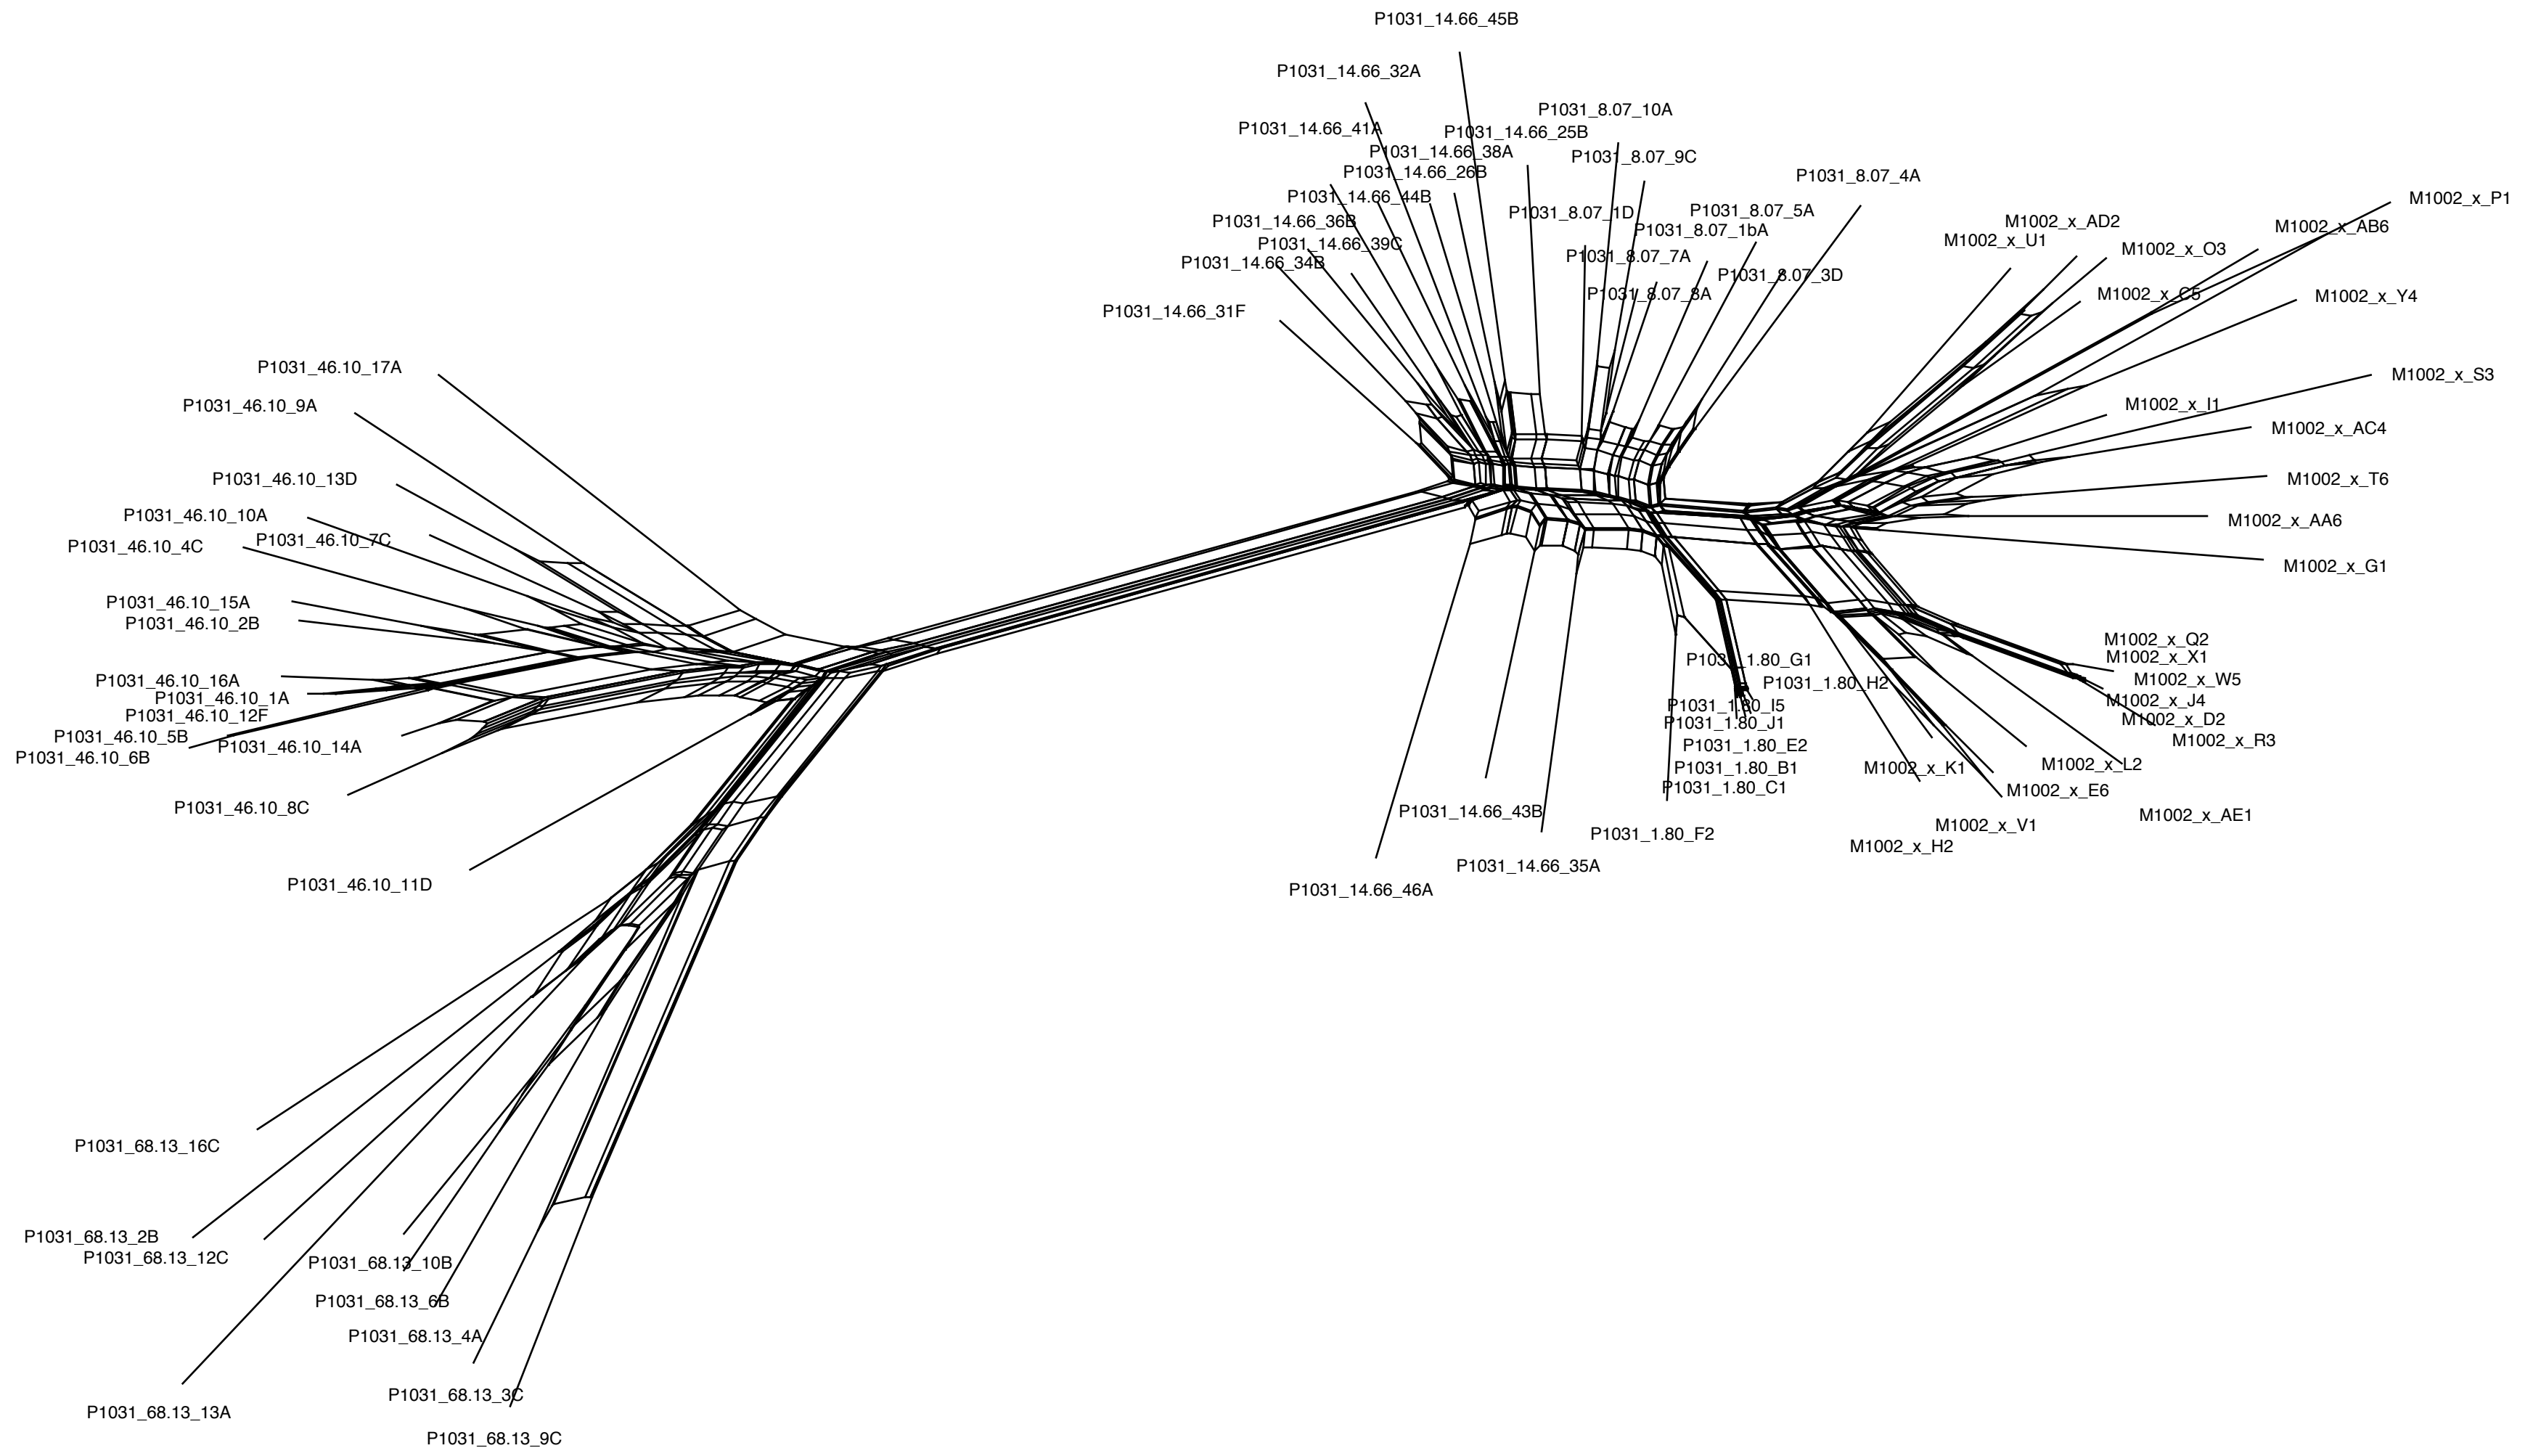

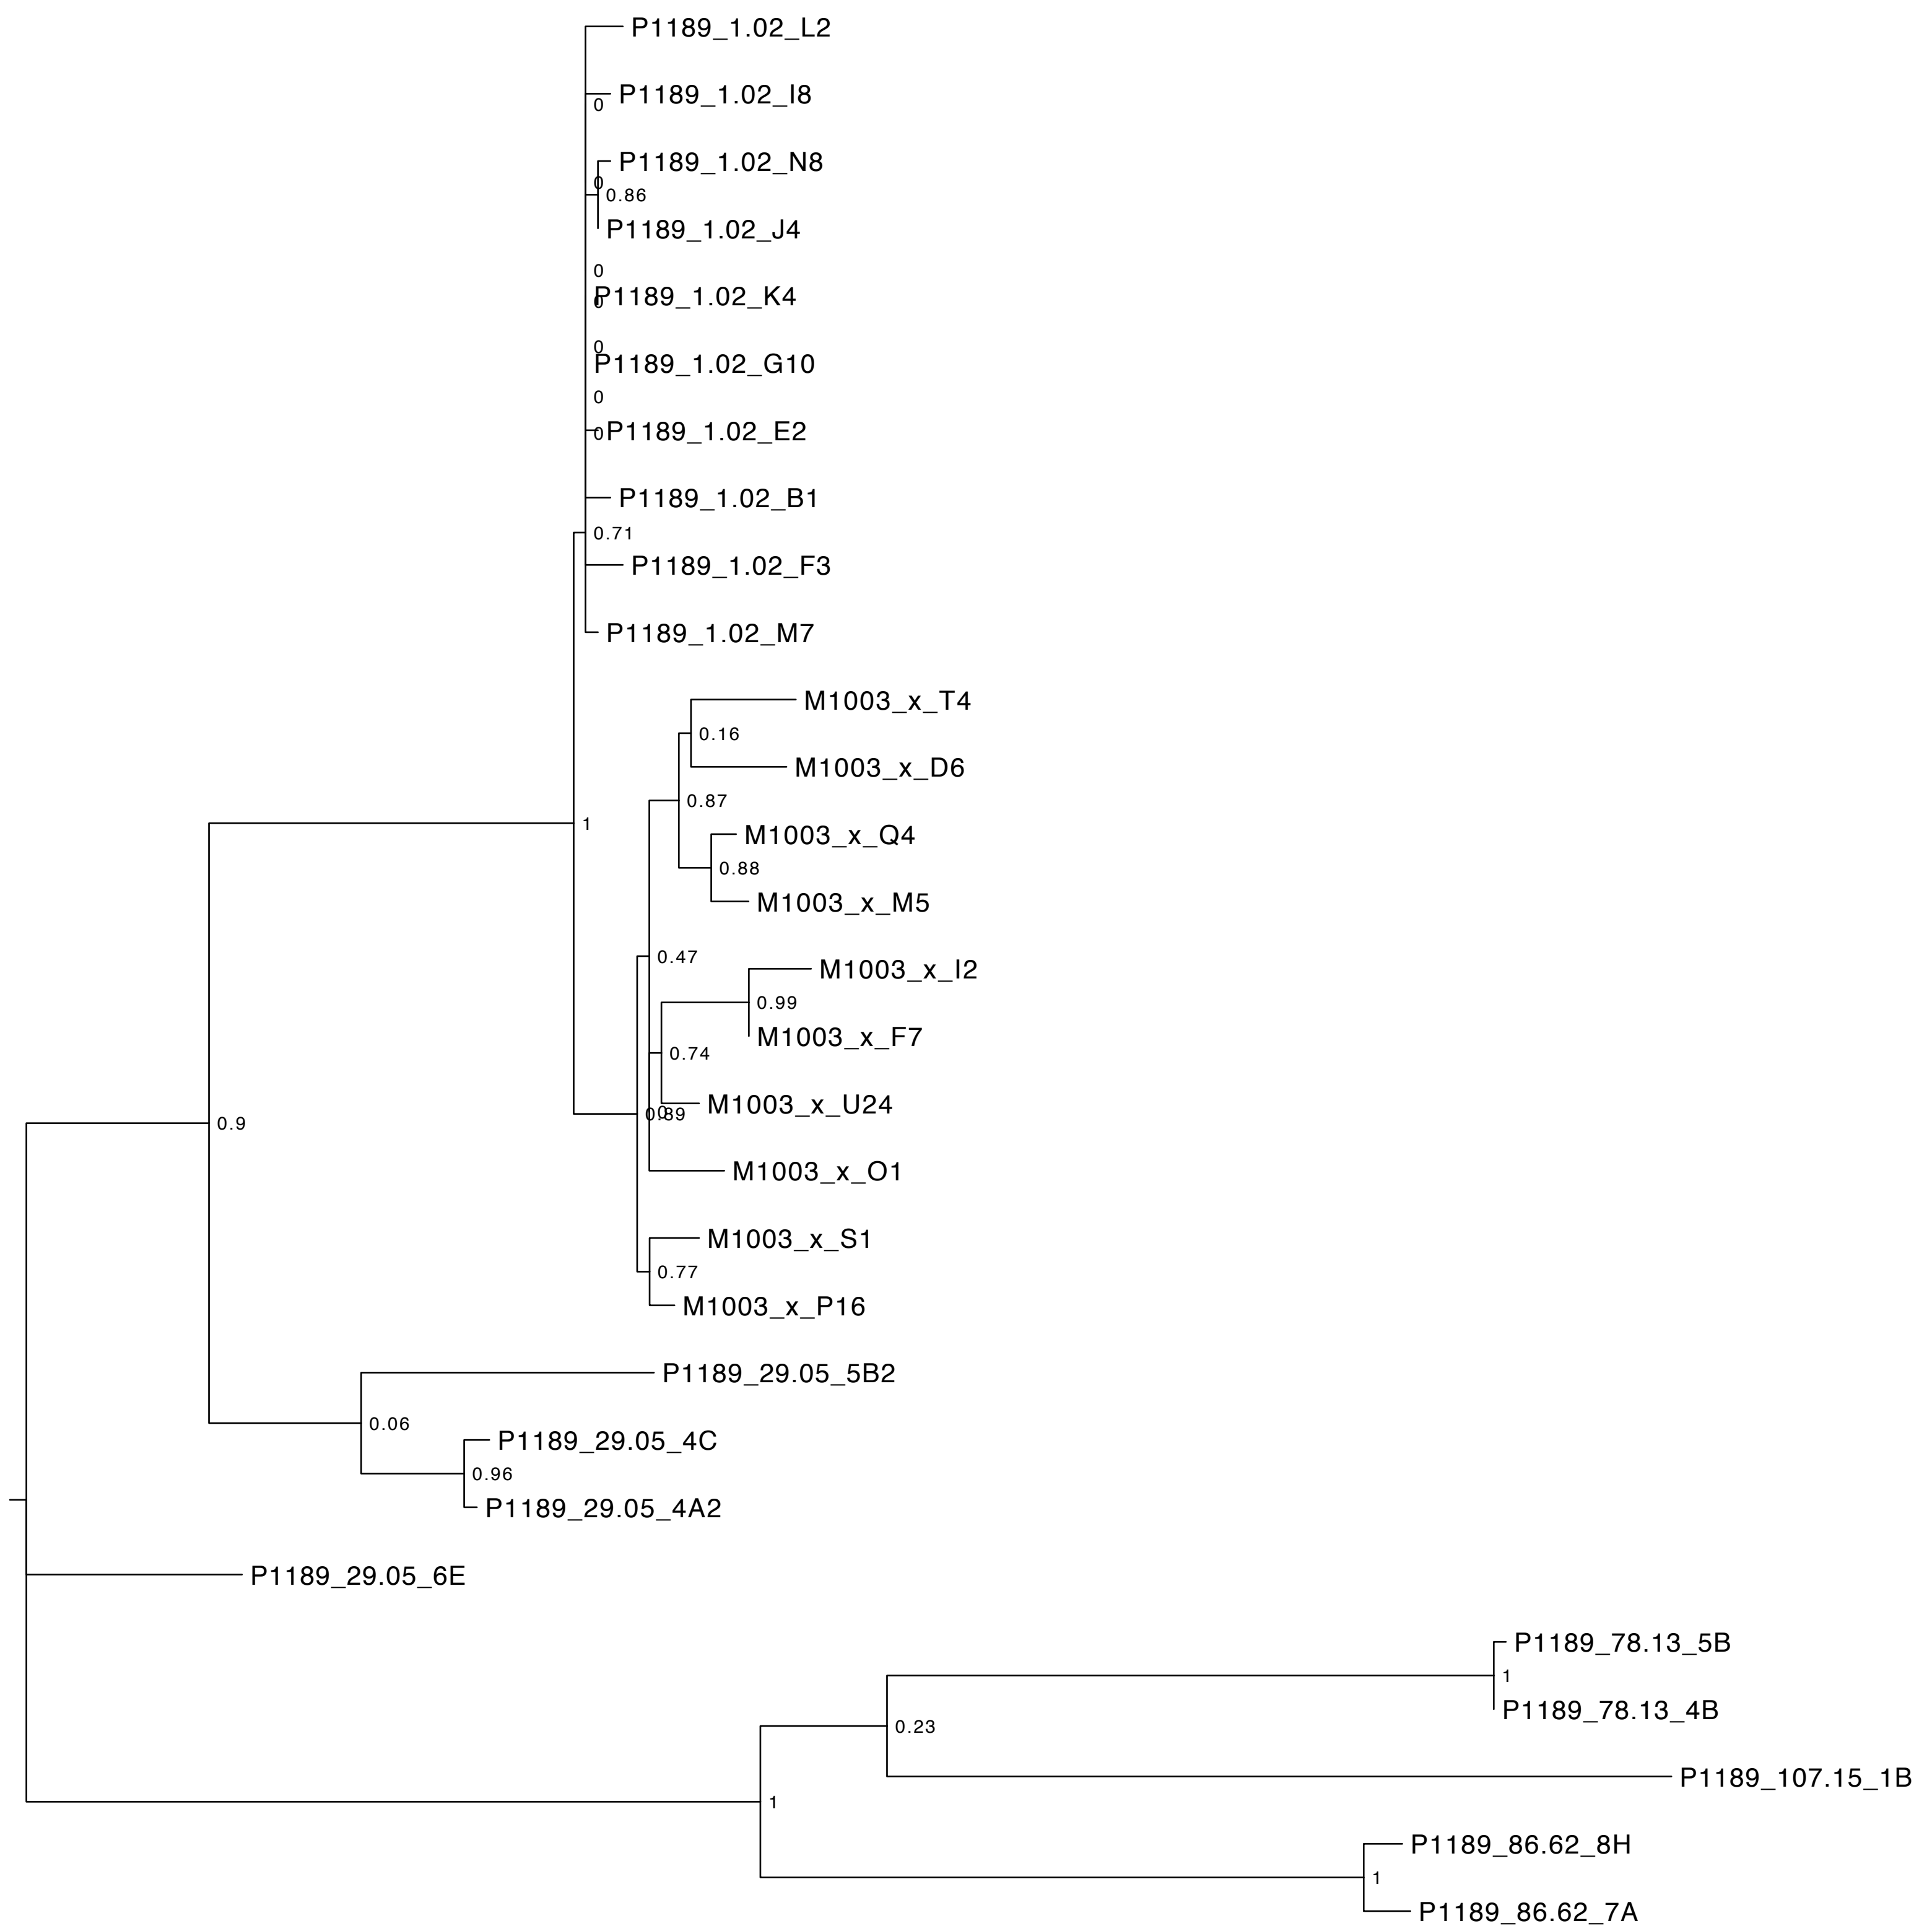

0.0010

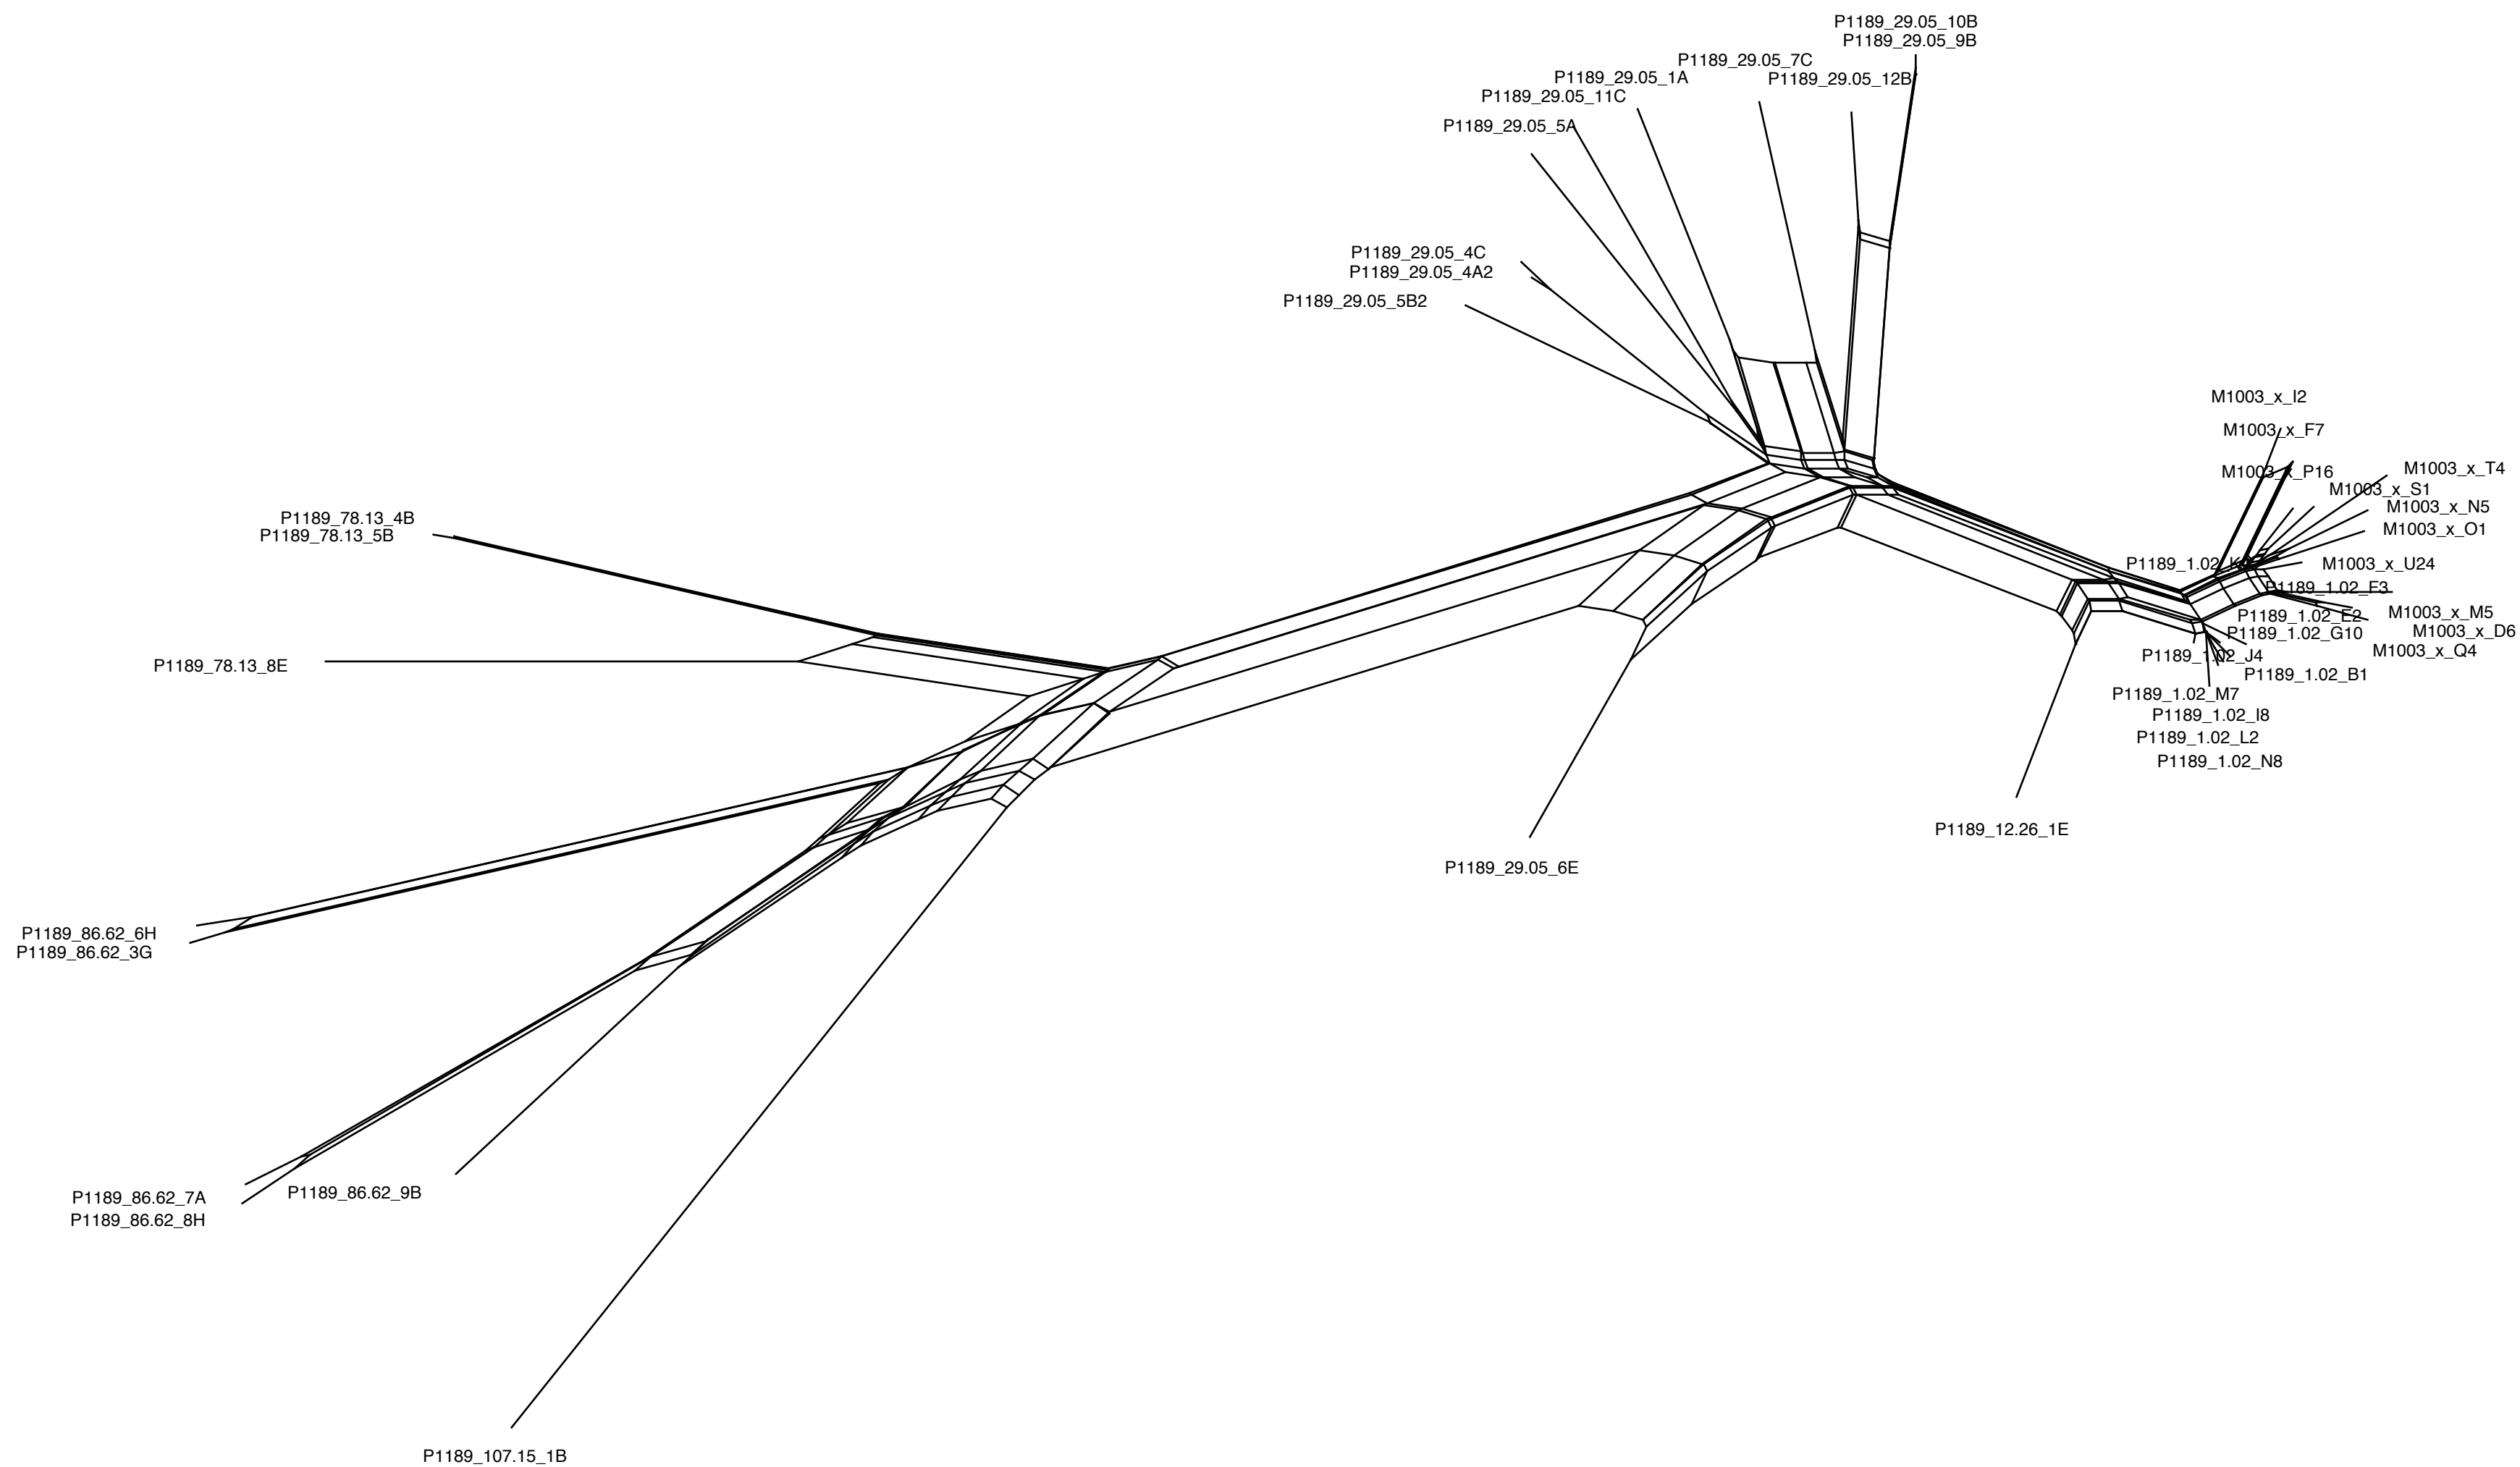

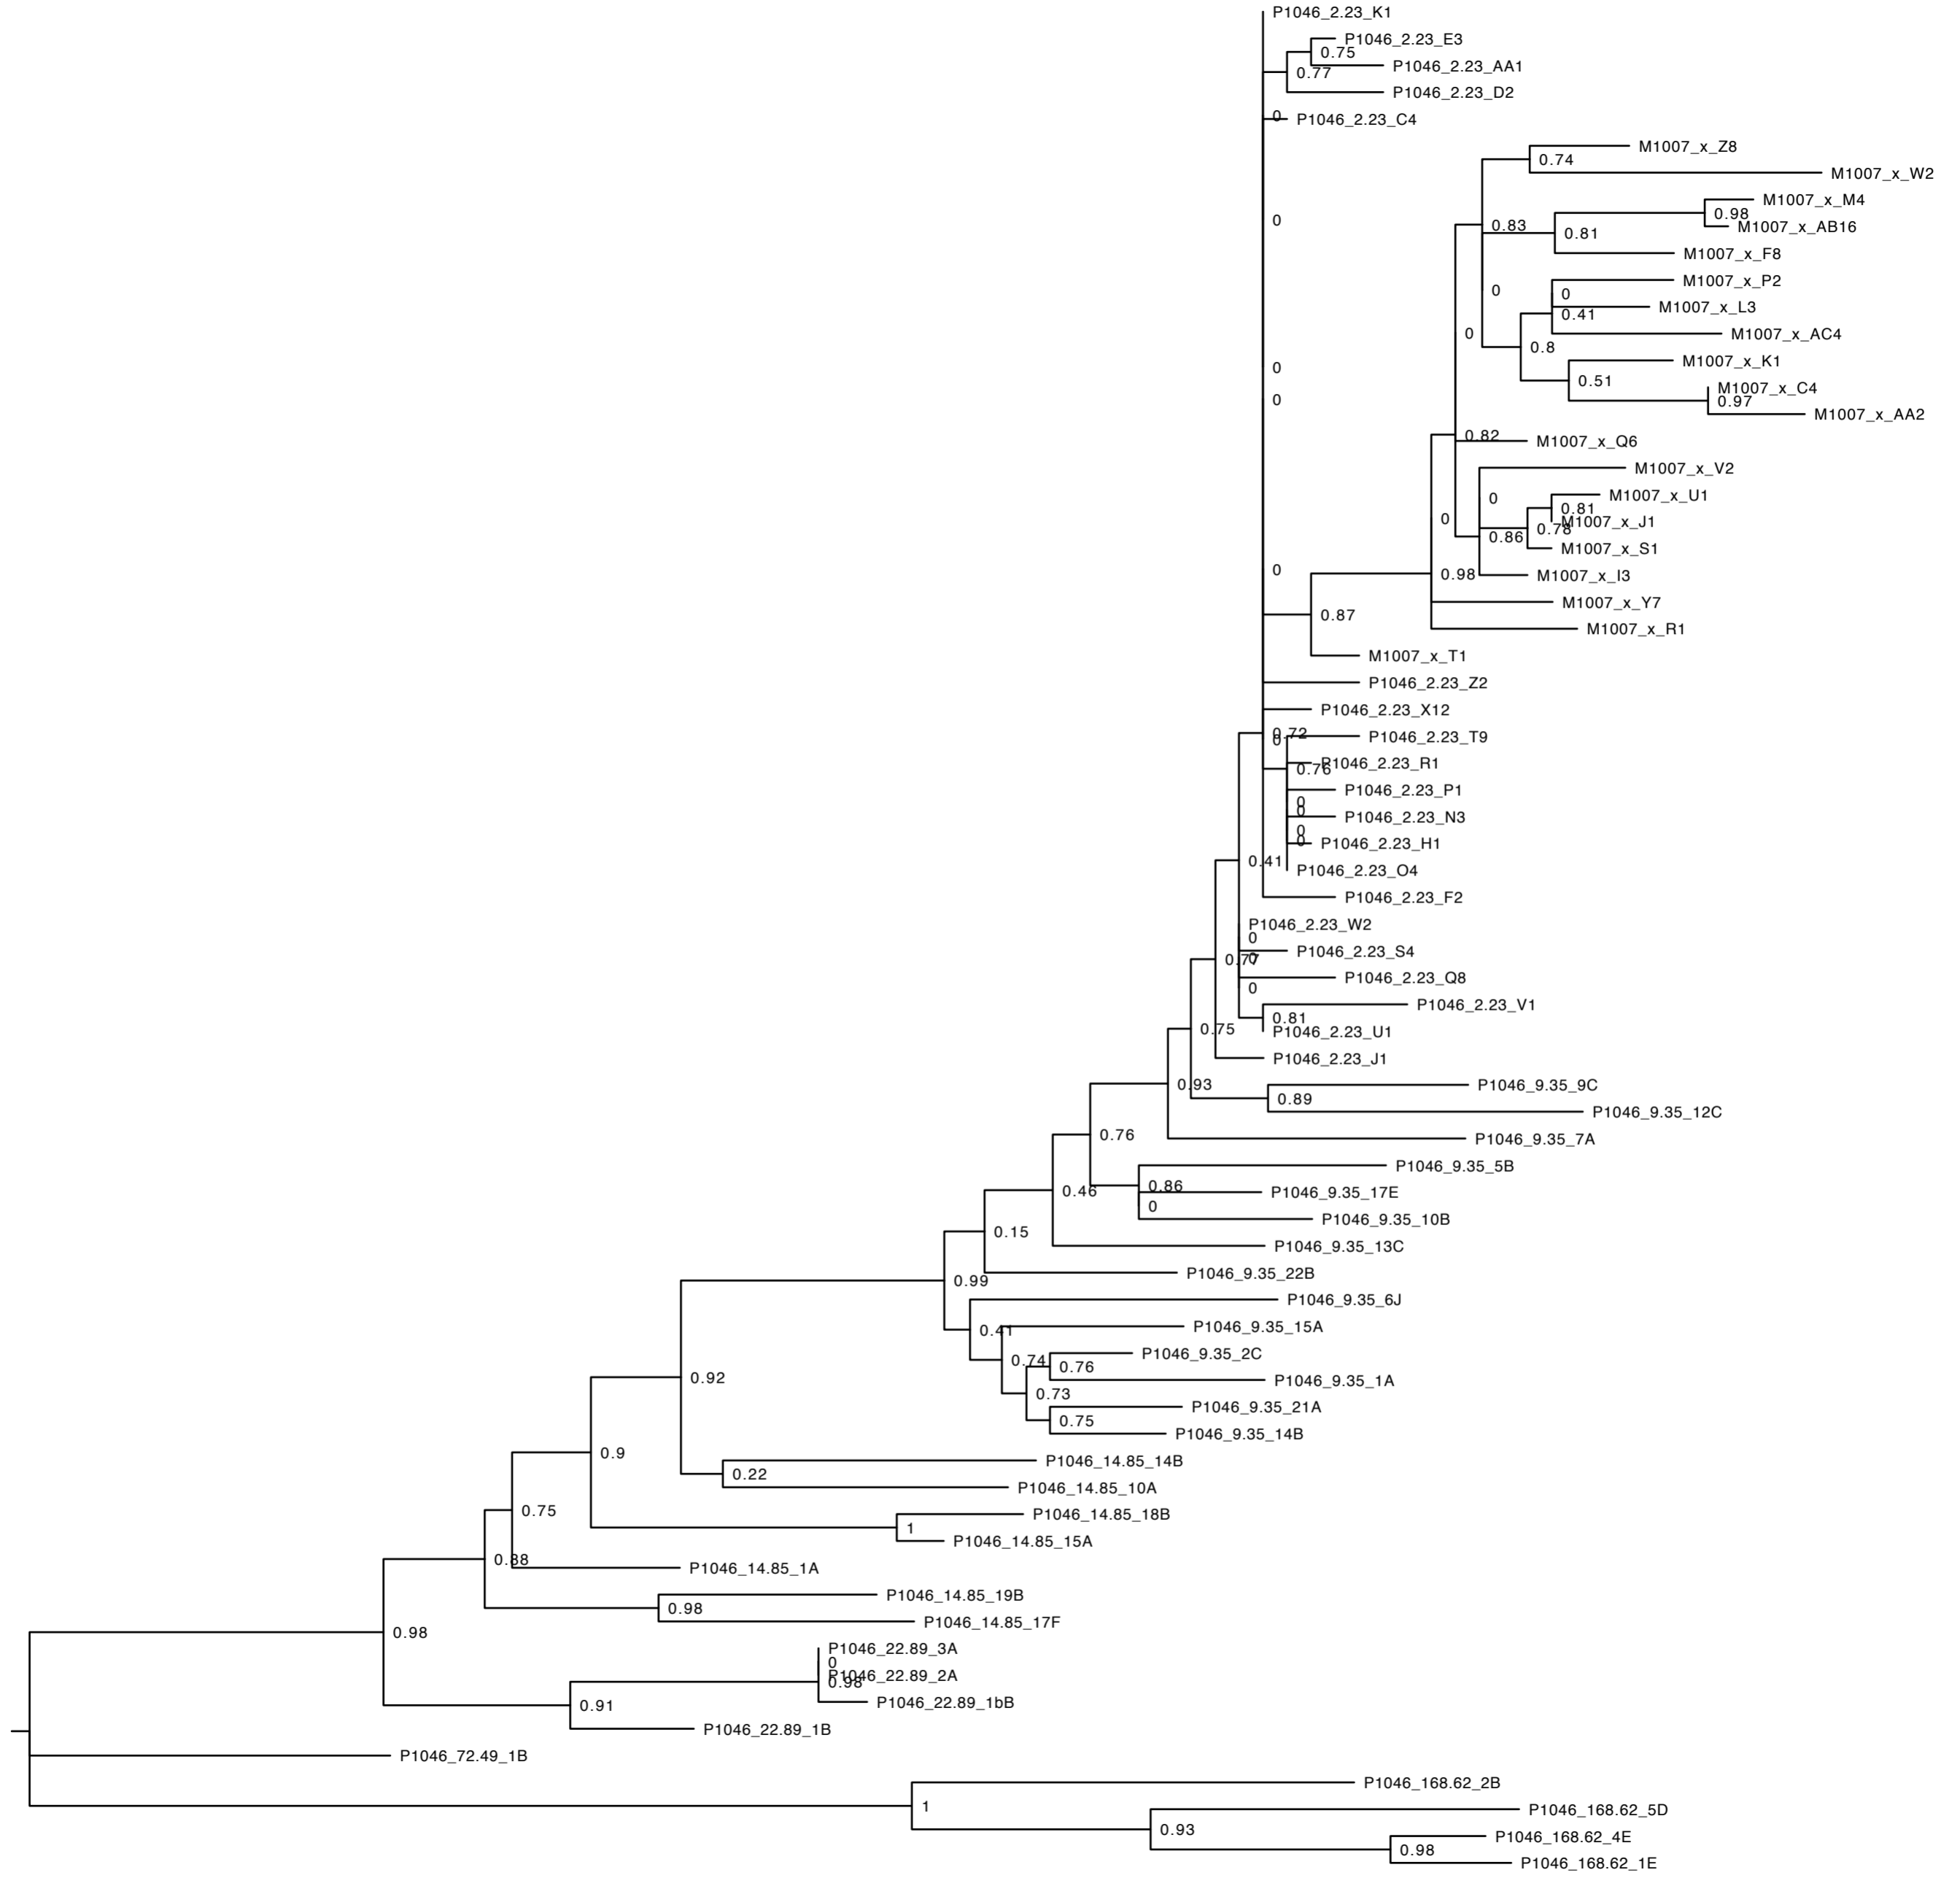

0.004

0.0010

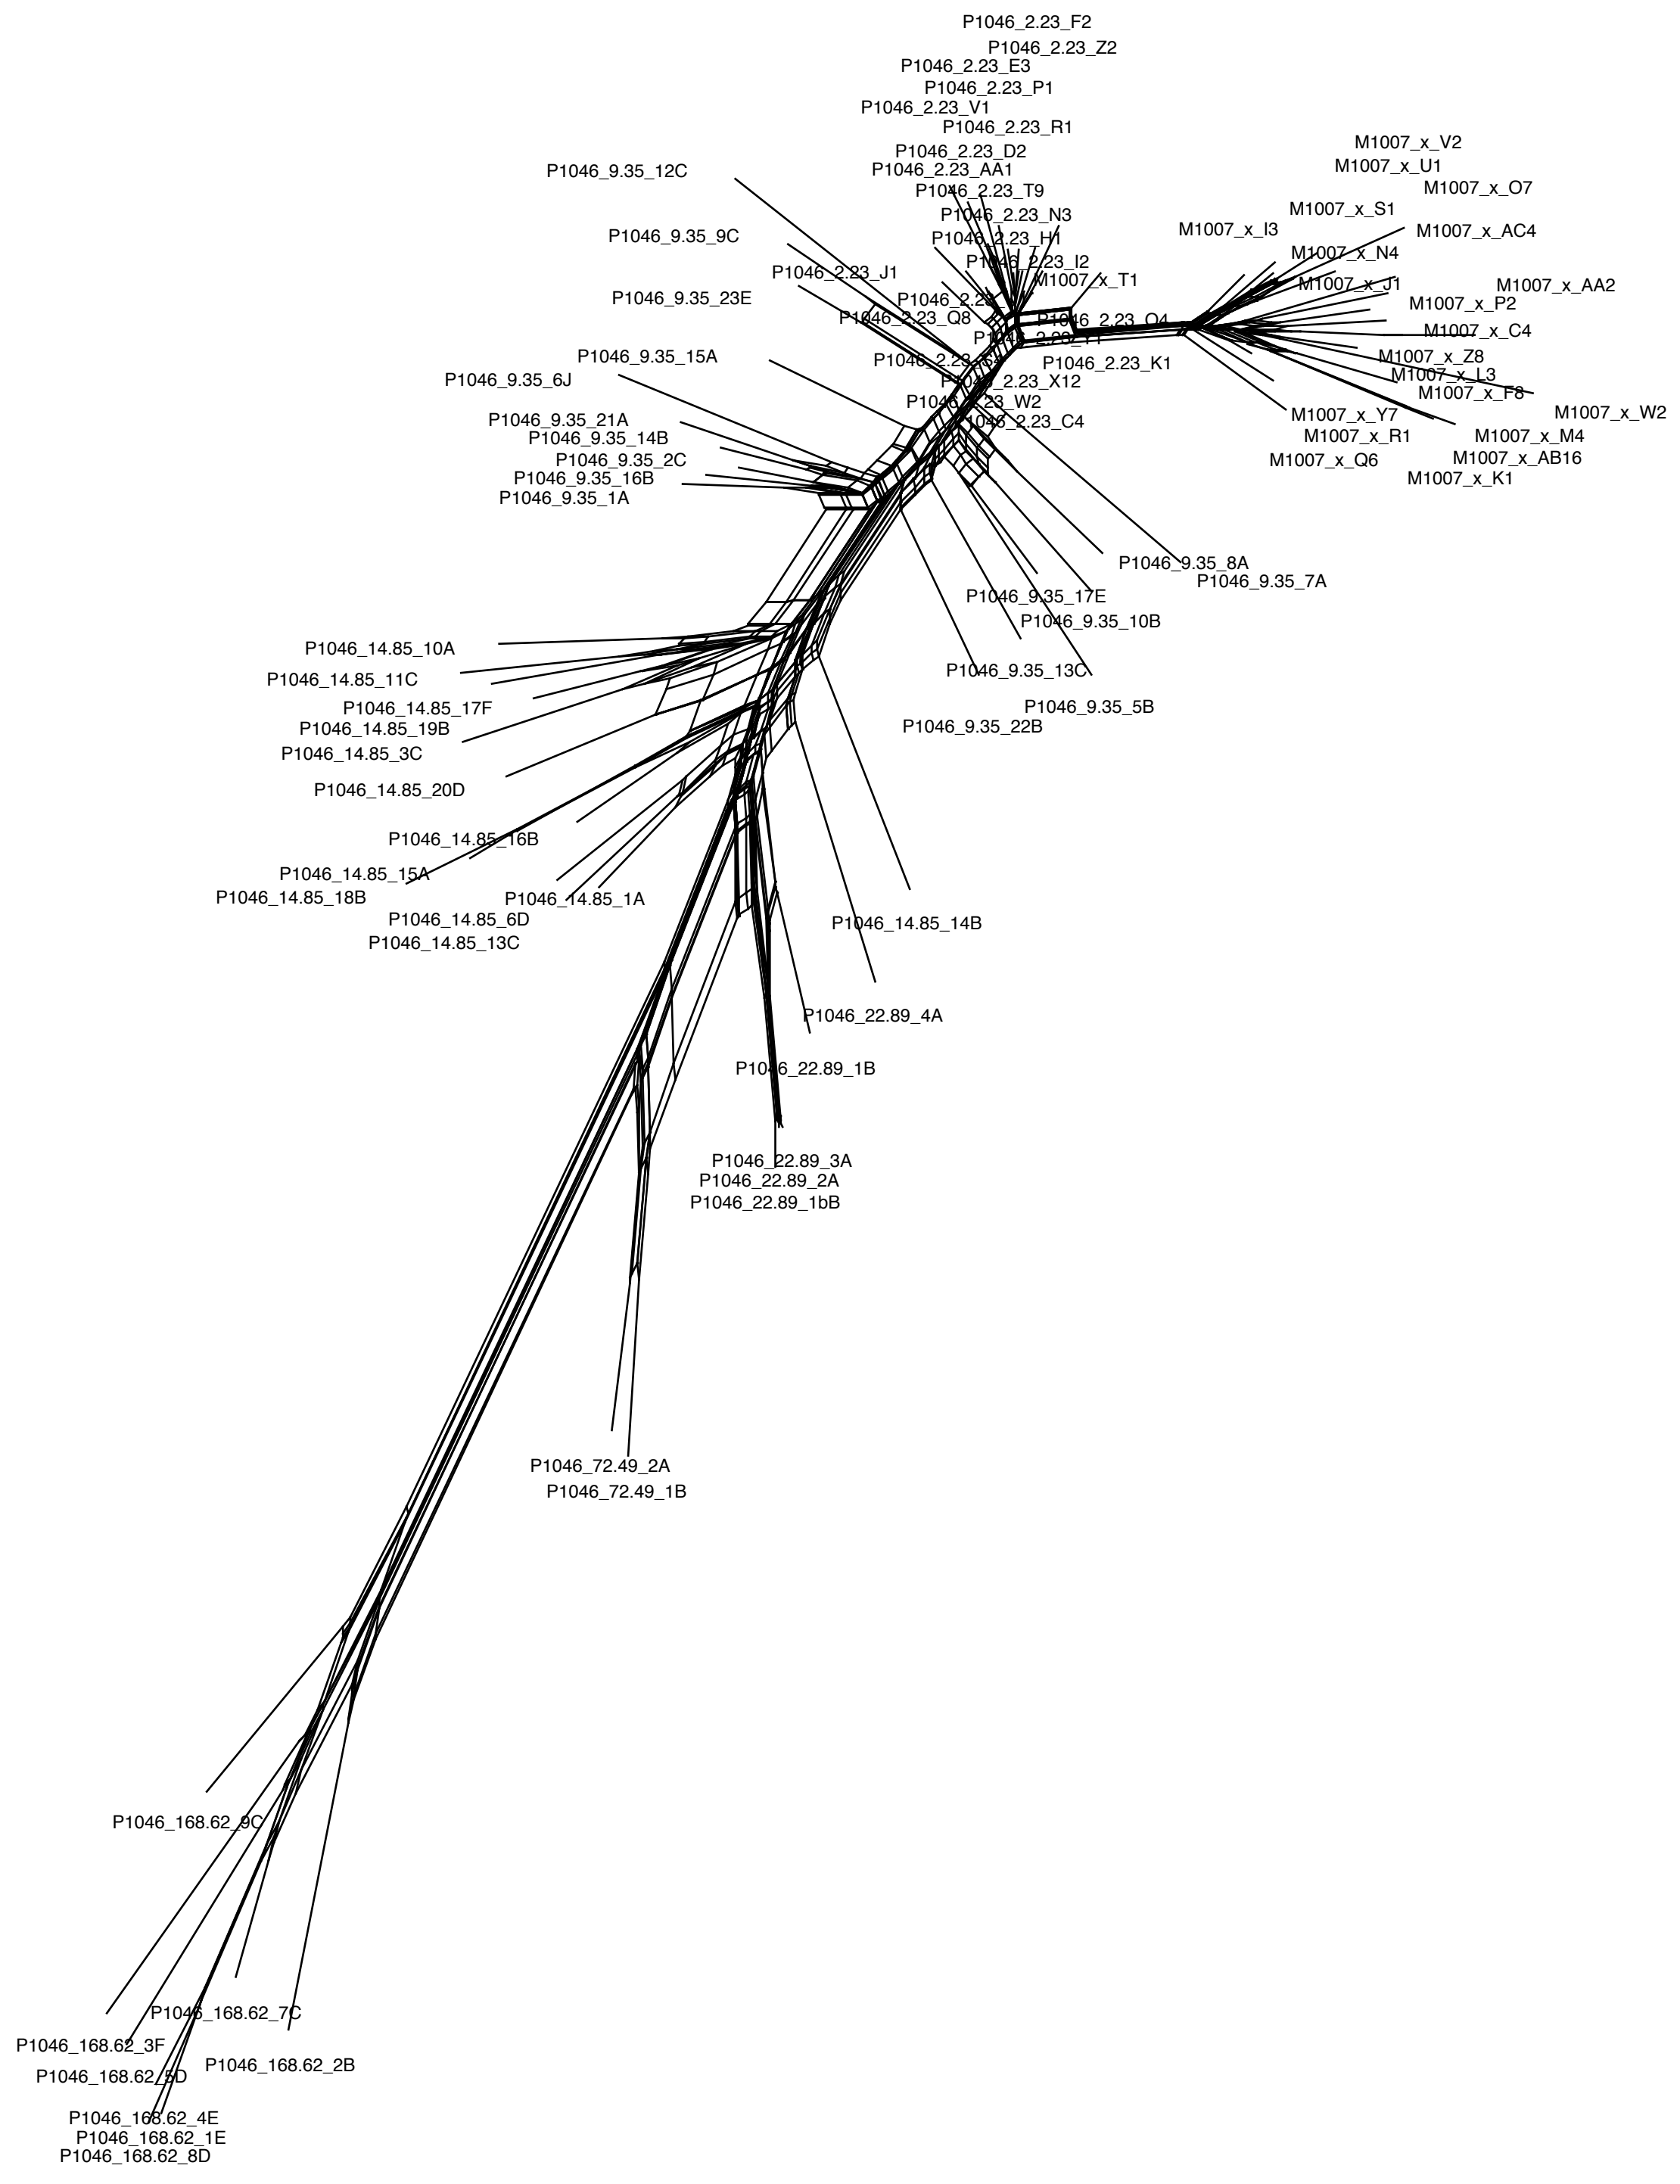

Supplement: 12977_2015_222_MOESM1_ESM.pdf [file 12977_2015_222_MOESM1_ESM.pdf]
