# Supplementary material for: Recombination elevates the effective evolutionary rate and facilitates the establishment of HIV-1 infection in infants after mother-to-child transmission
Source: PubMed Central journal article supplement (PMC4647327; doi:10.1186/s12977-015-0222-0), 2015-11-16
Supplement: 12977_2015_222_MOESM2_ESM.pdf [file 12977_2015_222_MOESM2_ESM.pdf]

**Table S1. RIP results of h-PHI identified recombinant child HIV-1 taxa.**

| <b>Taxon</b> | <b>Related parents</b>         |
|--------------|--------------------------------|
| P1024-D1     | P1024-E1                       |
| P1024-G1     | n.s.                           |
| P1024-F2     | n.s.                           |
| P1024-N1     | n.s.                           |
| P1024-P3     | P1024-H2                       |
| P1024-10A    | P1024-19B, P1024-2C            |
| P1024-18A    | P1024-2C                       |
| P1024-8B     | P1024-2C                       |
| P1024-12B    | P1024-2C                       |
| P1024-13B    | P1024-2C                       |
| P1024-16B    | P1024-2C                       |
| P1024-3A     | P1024-11B, P1024-2C            |
| P1024-15D    | P1024-17C                      |
| P1024-6A     | P1024-23B, P1024-4A            |
| P1024-5B     | P1024-23B                      |
| P1024-20C    | P1024-17C, P1024-23B           |
| P1024-14A    | n.s.                           |
| P1024-8B     | P1024-10A                      |
| P1024-12A    | n.s.                           |
| P1024-3A     | n.s.                           |
| P1024-7C     | n.s.                           |
| P1024-4C     | P1024-2C                       |
| P1024-5A     | n.s.                           |
| P1031-10A    | n.s.                           |
| P1031-4A     | n.s.                           |
| P1031-12C    | n.s.                           |
| P1031-16C    | P1031-10B, P1031-2B, P1031-11D |
| P1031-4A     | P1031-10B                      |
| P1031-6B     | P1031-10B, P1031-9A            |
| P1031-9C     | P1031-3C                       |
| P1031-12F    | P1031-16A                      |
| P1031-13D    | P1031-9A                       |
| P1031-14A    | n.s.                           |
| P1031-1A     | P1031-16A                      |
| P1031-2B     | P1031-15A                      |
| P1031-7C     | P1031-10A                      |
| P1031-8C     | P1031-16A                      |
| P1031-B1     | P1031-E2                       |
| P1031-F2     | P1031-E2                       |
| P1031-G1     | P1031-E2                       |
| P1031-H2     | P1031-E2                       |

|           |                    |
|-----------|--------------------|
| P1031-I5  | P1031-E2           |
| P1031-J1  | P1031-E2           |
| P1031-25B | n.s.               |
| P1031-32A | n.s.               |
| P1031-38A | n.s.               |
| P1031-39C | n.s.               |
| P1031-43B | n.s.               |
| P1031-46A | n.s.               |
| P1189-1E  | n.s.               |
| P1189-10B | n.s.               |
| P1189-9B  | n.s.               |
| P1189-12B | n.s.               |
| P1189-11C | n.s.               |
| P1189-7C  | P1189-5B2          |
| P1189-5A  | n.s.               |
| P1189-1A  | P1189-5B2          |
| P1189-3G  | n.s.               |
| P1189-6H  | n.s.               |
| P1189-9B  | n.s.               |
| P1189-8E  | n.s.               |
| P1046-23E | n.s.               |
| P1046-8A  | n.s.               |
| P1046-4A  | P1046-1B           |
| P1046-2A  | n.s.               |
| P1046-3F  | P1046-4E, P1046-5D |
| P1046-7C  | P1046-2B, P1046-4E |
| P1046-8D  | P1046-4E           |
| P1046-9C  | P1046-2B, P1046-5D |
| P1046-I2  | n.s.               |
| P1046-Y1  | n.s.               |
| P1046-11C | n.s.               |
| P1046-13C | n.s.               |
| P1046-16B | P1046-1A           |
| P1046-20D | P1046-18B          |
| P1046-3C  | P1046-17F          |
| P1046-6D  | P1046-1A           |

n.s., no significant parent detected by RIP
