# Supplementary material for: Recombination elevates the effective evolutionary rate and facilitates the establishment of HIV-1 infection in infants after mother-to-child transmission
Source: PubMed Central journal article supplement (PMC4647327; doi:10.1186/s12977-015-0222-0), 2015-11-16
Supplement: 12977_2015_222_MOESM3_ESM.pdf [file 12977_2015_222_MOESM3_ESM.pdf]

**Table S2. Analysis of potentially advantageous motifs in longitudinally collected *env* sequences from mother/child pairs.**

| Patient      | Motif:       | 12His                                         | E62D N92D Y330H Q344K                                            |      |      |      | Lack of 156N                                                                                                                  | Lack of 160N | Lack of 173N | Lack of 197N glycan                             | Lack of 325N                | 328A                               | Lack of 332N Glycan                             | Coreceptor Tropism                             | V2 LDV motif                                       | GPGR                                                | Number of advantageous motifs in recombinant/<br>non-recombinant sequences |
|--------------|--------------|-----------------------------------------------|------------------------------------------------------------------|------|------|------|-------------------------------------------------------------------------------------------------------------------------------|--------------|--------------|-------------------------------------------------|-----------------------------|------------------------------------|-------------------------------------------------|------------------------------------------------|----------------------------------------------------|-----------------------------------------------------|----------------------------------------------------------------------------|
|              | advantage:   | Increases Env density on virions <sup>1</sup> | Increase possibility of escape from CTL recognition <sup>2</sup> |      |      |      | N glycans are involved in antibody neutralization by PG9/PG16; glycan loss improves resistance to neutralization <sup>3</sup> |              |              | glycan loss increases CCR5 binding <sup>4</sup> | PGT128 contact <sup>5</sup> | Improves CCR5 binding <sup>6</sup> | PGT128 antibody targets the glycan <sup>7</sup> | CCR5 vs. CXCR4 coreceptor binding <sup>8</sup> | Binding to $\alpha 4\beta 7$ integrin <sup>9</sup> | Broadly neutralizing antibody binding <sup>10</sup> |                                                                            |
|              | Age (months) |                                               |                                                                  |      |      |      |                                                                                                                               |              |              |                                                 |                             |                                    |                                                 |                                                |                                                    |                                                     |                                                                            |
| <b>M1001</b> |              | 18/0                                          | 0/18                                                             | 0/18 | 17/1 | 0/18 | 0/18                                                                                                                          | 0/18         | 18/0         | 0/18                                            | 13/5                        | 18/0                               | 0/18                                            | R5                                             | 0/18                                               | 1/17                                                | 4.58/4.83                                                                  |
| <b>P1024</b> | 1.70         | 6/2                                           | 0/8                                                              | 0/8  | 8/0  | 0/8  | 0/8                                                                                                                           | 0/8          | 8/0          | 0/8                                             | 8/0                         | 8/0                                | 0/8                                             | R5                                             | 0/8                                                | 0/8                                                 | 4.8/4.67                                                                   |
|              | 38.20        | 0/21                                          | 0/21                                                             | 5/16 | 21/0 | 0/21 | 0/21                                                                                                                          | 0/21         | 21/0         | 1/20                                            | 7/14                        | 21/0                               | 0/21                                            | R5                                             | 0/21                                               | 12/9                                                | 3.75/3.4                                                                   |
|              | 66.16        | 0/9                                           | 0/9                                                              | 3/6  | 9/0  | 0/9  | 0/9                                                                                                                           | 0/9          | 9/0          | 0/9                                             | 3/6                         | 9/0                                | 0/9                                             | R5                                             | 0/9                                                | 7/2                                                 | 3.5/4                                                                      |
| <b>M1002</b> |              | 24/1                                          | 5/20                                                             | 0/25 | 25/0 | 0/25 | 0/25                                                                                                                          | 11/14        | 25/0         | 0/25                                            | 25/0                        | 25/0                               | 0/25                                            | R5                                             | 25/0                                               | 25/0                                                | 5.71/5.5                                                                   |
| <b>P1031</b> | 1.80         | 8/0                                           | 0/8                                                              | 0/8  | 8/0  | 0/8  | 0/8                                                                                                                           | 8/0          | 8/0          | 0/8                                             | 8/0                         | 8/0                                | 0/8                                             | R5                                             | 8/0                                                | 8/0                                                 | 6/6                                                                        |
|              | 8.07         | 9/0                                           | 7/2                                                              | 0/9  | 9/0  | 0/9  | 0/9                                                                                                                           | 0/9          | 9/0          | 0/9                                             | 9/0                         | 9/0                                | 0/9                                             | R5                                             | 9/0                                                | 9/0                                                 | 5.5/5.86                                                                   |
|              | 14.66        | 14/0                                          | 12/2                                                             | 0/14 | 14/0 | 0/14 | 0/14                                                                                                                          | 0/14         | 14/0         | 0/14                                            | 14/0                        | 14/0                               | 0/14                                            | R5                                             | 14/0                                               | 14/0                                                | 6/5.75                                                                     |
|              | 46.10        | 16/0                                          | 16/0                                                             | 0/16 | 16/0 | 0/16 | 0/16                                                                                                                          | 0/16         | 16/0         | 0/16                                            | 16/0                        | 16/0                               | 0/16                                            | R5                                             | 16/0                                               | 4/12                                                | 6/6                                                                        |
|              | 68.13        | 9/0                                           | 9/0                                                              | 0/9  | 9/0  | 0/9  | 0/9                                                                                                                           | 0/9          | 9/0          | 0/9                                             | 9/0                         | 9/0                                | 0/9                                             | R5                                             | 9/0                                                | 3/6                                                 | 6/6                                                                        |
| <b>M1007</b> |              | 22/0                                          | 22/0                                                             | 0/22 | 22/0 | 0/22 | 0/22                                                                                                                          | 0/22         | 22/0         | 0/22                                            | 22/0                        | 22/0                               | 0/22                                            | R5                                             | 0/22                                               | 22/0                                                | 6/6                                                                        |
| <b>P1046</b> | 2.23         | 22/0                                          | 22/0                                                             | 0/22 | 22/0 | 0/22 | 0/22                                                                                                                          | 0/22         | 22/0         | 0/22                                            | 22/0                        | 22/0                               | 0/22                                            | R5                                             | 0/22                                               | 22/0                                                | 5/5                                                                        |
|              | 9.35         | 16/0                                          | 16/0                                                             | 0/16 | 16/0 | 0/16 | 0/16                                                                                                                          | 0/16         | 16/0         | 0/16                                            | 14/2                        | 16/0                               | 1/15                                            | R5                                             | 0/16                                               | 15/1                                                | 5.67/6                                                                     |
|              | 14.85        | 12/0                                          | 12/0                                                             | 0/12 | 10/2 | 0/12 | 0/12                                                                                                                          | 0/12         | 0/12         | 0/12                                            | 3/9                         | 12/0                               | 0/12                                            | R5                                             | 0/12                                               | 12/0                                                | 4/4.17                                                                     |
|              | 22.89        | 5/0                                           | 5/0                                                              | 0/5  | 5/0  | 0/5  | 0/5                                                                                                                           | 0/5          | 0/5          | 0/5                                             | 1/4                         | 5/0                                | 0/5                                             | R5                                             | 0/5                                                | 5/0                                                 | 5/4                                                                        |
|              | 72.49        | 2/0                                           | 2/0                                                              | 0/2  | 2/0  | 0/2  | 0/2                                                                                                                           | 0/2          | 0/2          | 0/2                                             | 0/2                         | 2/0                                | 0/2                                             | R5                                             | 0/2                                                | 2/0                                                 | 4/4                                                                        |
|              | 168.62       | 8/0                                           | 8/0                                                              | 0/8  | 8/0  | 0/8  | 0/8                                                                                                                           | 0/8          | 0/8          | 0/8                                             | 0/8                         | 8/0                                | 0/8                                             | R5 - one X4                                    | 0/8                                                | 5/3                                                 | 4/4                                                                        |
| <b>M1003</b> |              | 11/0                                          | 0/11                                                             | 0/11 | 11/0 | 0/11 | 0/11                                                                                                                          | 0/11         | 11/0         | 0/11                                            | 11/0                        | 11/0                               | 0/11                                            | R5                                             | 11/0                                               | 0/11                                                | 5/5                                                                        |
| <b>P1189</b> | 1.02         | 10/0                                          | 0/10                                                             | 0/10 | 10/0 | 0/10 | 0/10                                                                                                                          | 0/10         | 10/0         | 0/10                                            | 10/0                        | 10/0                               | 0/10                                            | R5                                             | 10/0                                               | 0/10                                                | -/5                                                                        |
|              | 12.26        | 1/0                                           | 0/1                                                              | 0/1  | 1/0  | 0/1  | 0/1                                                                                                                           | 0/1          | 1/0          | 0/1                                             | 1/0                         | 1/0                                | 0/1                                             | R5                                             | 1/0                                                | 0/1                                                 | 5/-                                                                        |
|              | 29.05        | 10/1                                          | 0/11                                                             | 0/11 | 11/0 | 0/11 | 0/11                                                                                                                          | 11/0         | 11/0         | 0/11                                            | 11/0                        | 11/0                               | 0/11                                            | R5                                             | 11/0                                               | 0/11                                                | 5.86/6                                                                     |
|              | 78.13        | 3/0                                           | 0/3                                                              | 0/3  | 3/0  | 0/3  | 0/3                                                                                                                           | 0/3          | 3/0          | 0/3                                             | 3/0                         | 3/0                                | 0/3                                             | R5                                             | 3/0                                                | 0/3                                                 | 5/5                                                                        |
|              | 86.62        | 5/0                                           | 0/5                                                              | 0/5  | 5/0  | 0/5  | 0/5                                                                                                                           | 2/3          | 5/0          | 0/5                                             | 5/0                         | 5/0                                | 0/5                                             | R5                                             | 5/0                                                | 0/5                                                 | 5.67/5                                                                     |

Analysis of potentially advantageous motifs in longitudinally collected *env* sequences is shown, with each residue number referring to HXB2 as a reference sequence. For each patient time point, the number of sequences possessing each motif is shown first, followed by the number of sequences not possessing the motif (yes/no). The final column indicates the average number of potentially advantageous motifs in recombinant sequences, as defined by h-PHI analysis, followed by the average for non-recombinant sequences (recomb/non-recomb). <sup>1</sup>Gnanakaran, 2011; <sup>2</sup>Troyer, 2009; <sup>3</sup>Pancera, 2013; <sup>4</sup>Haim, 2011; <sup>5</sup>Pejchal 2011, Moore 2012; <sup>6</sup>Wang, 1999; <sup>7</sup>Moore, 2012; <sup>8</sup>WebPSSM, <http://indra.mullins.microbiol.washington.edu/webpssm/>; <sup>9</sup>Arthos, 2008; <sup>10</sup>Zolla-Pazner, 2004
