# Supplementary material for: Recombination elevates the effective evolutionary rate and facilitates the establishment of HIV-1 infection in infants after mother-to-child transmission
Source: PubMed Central journal article supplement (PMC4647327; doi:10.1186/s12977-015-0222-0), 2015-11-16
Supplement: 12977_2015_222_MOESM4_ESM.pdf [file 12977_2015_222_MOESM4_ESM.pdf]

**Table S3. Variable region analysis of longitudinally collected *env* sequences from mother/child pairs.**

| Patient <sup>1</sup> | Age (mos.)    | V1                  |                     |                   | V2         |               |             | V3     |             |             | V4         |               |           | V5         |               |         |
|----------------------|---------------|---------------------|---------------------|-------------------|------------|---------------|-------------|--------|-------------|-------------|------------|---------------|-----------|------------|---------------|---------|
|                      |               | Length <sup>2</sup> | Charge <sup>3</sup> | PNGs <sup>4</sup> | Length     | Charge        | PNGs        | Length | Charge      | PNGs        | Length     | Charge        | PNGs      | Length     | Charge        | PNGs    |
| <b>M-1001</b>        | -             | 32 (31-33)          | +2 (0 to 3)         | 3.5 (3-4)         | 48 (45-48) | -1 (-3 to -1) | 3 (1-3)     | 35     | +4 (4 to 6) | 1           | 34         | -4 (-5 to -2) | 4 (3-5)   | 12         | -1 (-1 to 0)  | 1       |
| <b>P-1024</b>        | 1.7           | 32 (31-32)          | +1 (1 to 2)         | 4 (3-4)           | 48         | -2            | 3           | 35     | +4          | 1           | 34         | -5            | 4         | 12         | 0 (-1 to 0)   | 1       |
|                      | 38.2          | 27.5 (24-32)        | -1 (-1 to 2)        | 2 (1-3)           | 43 (39-48) | -1 (-3 to 1)  | 2 (2-3)     | 35     | +6 (5 to 7) | 1           | 31 (30-32) | -3 (-7 to 0)  | 3 (3-4)   | 12 (12-13) | 0 (-1 to 0)   | 2       |
|                      | 66.16         | 22 (19-27)          | 0 (0 to 2)          | 2 (1-2)           | 41 (39-46) | -1 (-2 to 0)  | 2           | 35     | 5 (4 to 6)  | 1           | 30 (30-32) | -1 (-3 to 0)  | 4 (3-4)   | 12         | 1 (0 to 1)    | 2       |
| <b>M-1002</b>        | -             | 31 (26-31)          | -2 (-3 to 0)        | 3 (2-4)           | 37 (37-41) | +2 (-1 to 3)  | 2 (1-3)     | 35     | +5          | 1           | 30         | -1 (-2 to 0)  | 5 (3-5)   | 11         | 0 (-1 to 0)   | 1 (1-2) |
| <b>P-1031</b>        | 1.8           | 31                  | -2                  | 3                 | 37         | +3            | 1           | 35     | +5          | 1           | 30         | -1            | 5 (4-5)   | 11         | -1 (-1 to 0)  | 1       |
|                      | 8.07          | 26 (26-31)          | -2 (-3 to -2)       | 2 (2-3)           | 37         | +2            | 2           | 35     | +5 (4 to 5) | 1           | 30         | -1 (-2 to -1) | 5         | 11 (11-13) | -1 (-2 to 0)  | 1 (1-2) |
|                      | 11.8          | 26                  | -1 (-2 to 0)        | 2                 | 38 (37-41) | +2 (1 to 2)   | 3 (2-3)     | 35     | +5          | 1           | 30         | -1            | 5 (3-5)   | 9 (9-13)   | 0 (-1 to 0)   | 1 (1-2) |
|                      | 46.1          | 26 (26-29)          | +1 (1 to 2)         | 2 (2-3)           | 41 (39-45) | +1 (1 to 2)   | 2 (2-4)     | 35     | +5 (4 to 6) | 1           | 30         | -1 (-2 to -1) | 4 (4-5)   | 11 (10-11) | 0             | 2 (1-2) |
|                      | 68.13         | 25                  | -1                  | 2 (1-3)           | 45 (42-45) | +1 (-1 to 1)  | 4 (3-4)     | 35     | +4 (4 to 5) | 1           | 30         | -3 (-4 to 1)  | 5 (3-5)   | 10 (10-11) | -1 (-2 to -1) | 1 (1-2) |
| <b>M-1003</b>        | -             | 27                  | -2 (-4 to -1)       | 2 (1-3)           | 43         | +2            | 3           | 35     | +5          | 1           | 32         | -2            | 5 (4-5)   | 12         | -1 (-1 to 0)  | 2       |
| <b>P-1189</b>        | 1.02          | 27                  | -1 (-1 to 0)        | 3                 | 43         | +2            | 3           | 35     | +5          | 1           | 32         | -2            | 5         | 12         | 0             | 2       |
|                      | 12.26         | 27                  | -1                  | 3                 | 50         | +2            | 5           | 35     | +4          | 1           | 32         | -2            | 5         | 12         | 0             | 2       |
|                      | 28            | 22 (22-35)          | 0 (-2 to 1)         | 3 (3-5)           | 50 (43-51) | 0 (0 to 2)    | 4 (2-4)     | 35     | +4          | 1           | 30 (28-32) | -2 (-4 to 0)  | 4 (3-5)   | 12         | -1 (-1 to 0)  | 3       |
|                      | 78.13         | 42                  | 0 (0 to 1)          | 5 (4-5)           | 43         | +2            | 2           | 35     | +6          | 1           | 32 (32-35) | -2 (-4 to -2) | 4         | 12         | 0             | 2       |
|                      | 86.62         | 42 (40-42)          | -1 (-3 to -1)       | 4                 | 43 (41-43) | +2 (1 to 2)   | 2           | 35     | +6 (5 to 6) | 1           | 35         | -4 (-4 to -3) | 4         | 12         | 0 (-1 to 1)   | 2 (1-2) |
|                      | 107.15        | 41                  | -1                  | 4                 | 43         | +3            | 2           | 35     | +7          | 1           | 30         | -1            | 4         | 12         | 0             | 2       |
|                      | <b>M-1007</b> | -                   | 24 (24-31)          | -1 (-2 to 0)      | 2 (2-3)    | 39            | +1 (0 to 1) | 2      | 35          | +7 (6 to 7) | 1          | 32            | -3        | 5 (4-5)    | 13            | -1      |
| <b>P-1046</b>        | 2.23          | 31                  | -2                  | 3                 | 39         | +1            | 2           | 35     | +7          | 1           | 32         | -3 (-4 to -3) | 4 (3-4)   | 13         | -1 (-2 to -1) | 2 (1-2) |
|                      | 9.34          | 24 (19-25)          | 0 (-2 to 0)         | 2 (1-2)           | 39         | +1 (1 to 3)   | 2           | 35     | +6 (6 to 7) | 1 (0-1)     | 32 (28-32) | -3 (-4 to -2) | 4 (3-4)   | 10 (10-13) | -1 (-2 to 0)  | 1 (1-2) |
|                      | 14.85         | 25 (24-25)          | 0 (-1 to 1)         | 3 (2-3)           | 39         | +2.5 (1 to 3) | 2           | 35     | +6 (5 to 7) | 1           | 32         | -3            | 4 (3-4)   | 10         | -1 (-2 to 0)  | 1       |
|                      | 22.89         | 25                  | -2 (-2 to -1)       | 3                 | 39         | +1            | 2           | 35     | +6          | 1           | 30         | -3            | 4         | 11 (11-12) | -1            | 1       |
|                      | 72.49         | 28                  | -2.5 (-3 to -2)     | 3                 | 41         | 0             | 2           | 35     | +8          | 1           | 30         | -2            | 3.5       | 14         | -2            | 2       |
|                      | 168.62        | 36 (36-40)          | -2 (-3 to -1)       | 5 (3-5)           | 41         | +0.5 (0 to 1) | 2           | 35     | +7 (6 to 7) | 1           | 30         | -2 (-3 to -2) | 3.5 (3-4) | 13         | -2 (-3 to -1) | 2       |

Analysis of variable regions from longitudinally collected *env* sequences is shown, spanning variable regions 1 through 5 (V1-V5) of the *env* sequence.

<sup>1</sup> Patient code. M, maternal; P, child.

<sup>2-4</sup> Length, charge, and number of potential N-linked glycosylation sites (PNGs), respectively, of each variable region, as determined by the Variable Region Characteristics calculator ([www.hiv.lanl.gov](http://www.hiv.lanl.gov)).
